# Supplementary material for: On water catalyst-free synthesis of benzo[d]imidazo[2,1-b] thiazoles and novel N-alkylated 2-aminobenzo[d]oxazoles under microwave irradiation
Source: Royal Society of Chemistry journal article supplement (doi:10.1039/c9ra08929b), 2020-01-01
Supplement: c9ra08929b1.pdf [file c9ra08929b1.pdf]

## On Water Catalyst-Free Synthesis of Benzo[d]Imidazo[2,1-b] Thiazoles and Novel N-Alkylated 2-Aminobenzo[d]oxazoles Under Microwave Irradiation

Narasimharao Mukku, and Barnali Maiti\*

† Department of Chemistry, School of Advanced Sciences, Vellore Institute of Technology,

Vellore-632014, India.

Email: Barnalimaiti.m@gmail.com

### Table of contents

### Page No

1. Characterization data of compound 3a-5f.....2-37
2. Supporting data for microwave reaction.....38

Signature SIF VIT VELLORE  
NS-A-1

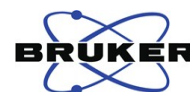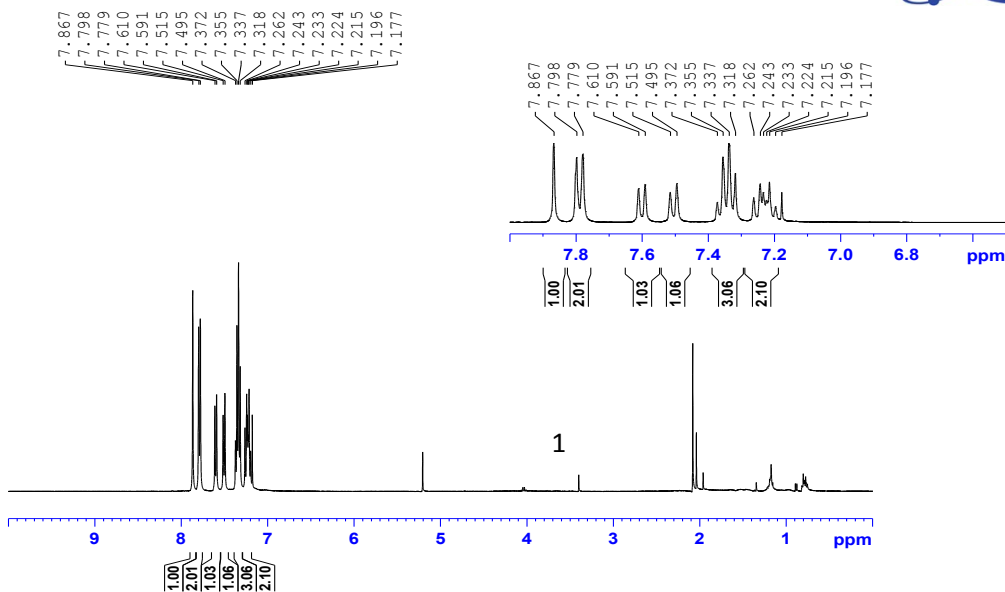

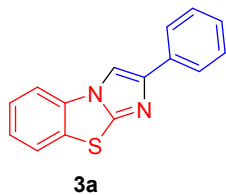

Signature SIF VIT VELLORE  
NS-A-1

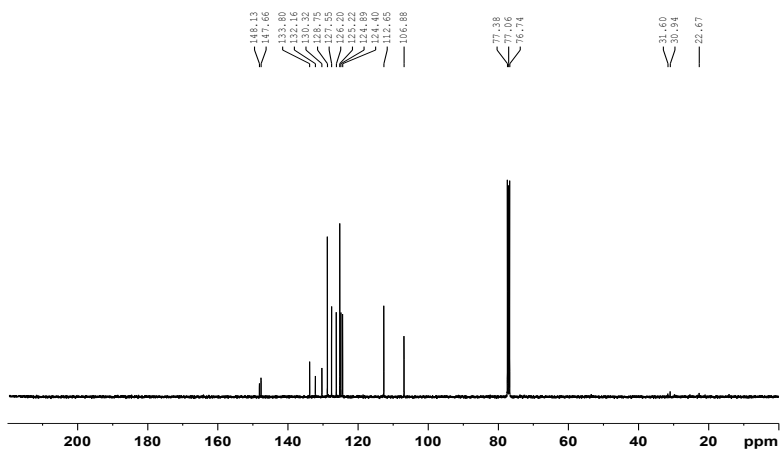

Current Data Parameters  
NAME NSA1  
EXPNO 14  
PROCNO 1

F2 - Acquisition Parameters  
Date\_ 20180209  
Time 2.00 h  
INSTRUM spect  
PROBHD z108618\_0505 (1  
PULPROG zgpg30  
TD 65536  
SOLVENT CDCl3  
NS 512  
DS 4  
SWH 24038.461 Hz  
FIDRES 0.733596 Hz  
AQ 1.3631488 sec  
RG 156.91  
DW 20.800 usec  
DE 6.50 usec  
TE 300.0 K  
D1 2.0000000 sec  
D11 0.0300000 sec  
TD0 1  
SFO1 100.6550186 MHz  
NUC1 13C  
P1 9.80 usec  
PLW1 58.0000000 W  
SFO2 400.2596010 MHz  
NUC2 1H  
CPDPRG2 waltz16  
PCPD2 90.00 usec  
PLW2 14.0000000 W  
PLW12 0.3509700 W  
PLW13 0.17654000 W

F2 - Processing parameters  
SI 32768  
SF 100.6449542 MHz  
WDW EM  
SSB EM  
LB 0 1.00 Hz  
GB 0  
PC 1.40

**$^1\text{H}$  and  $^{13}\text{C}$  NMR spectrum of compound 3a in  $\text{CDCl}_3$**

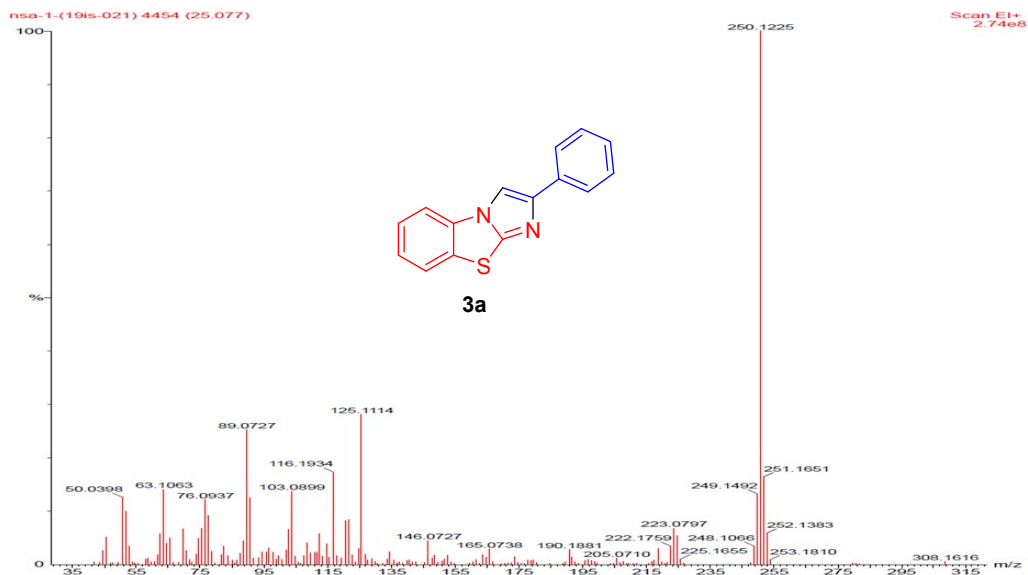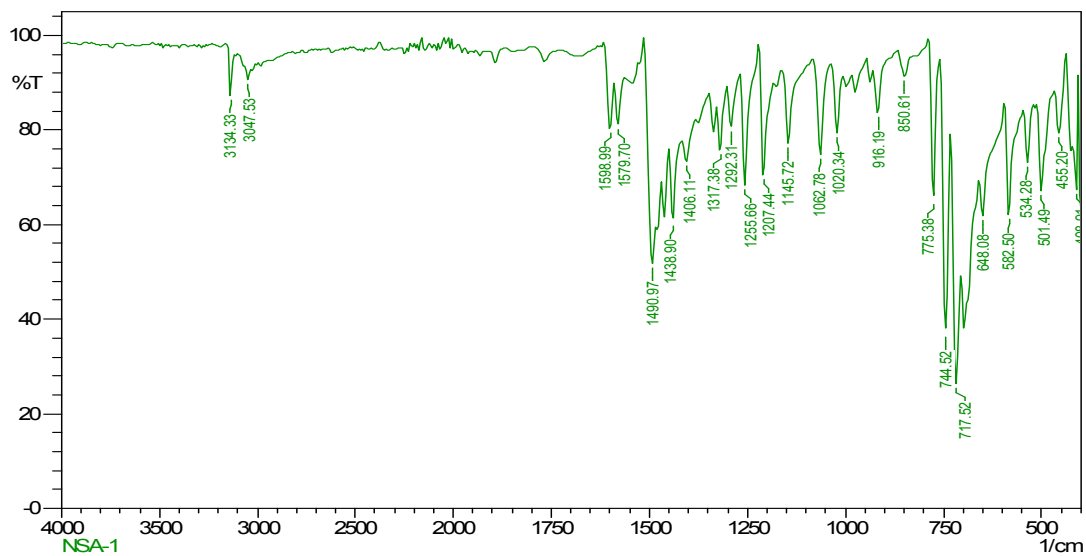

### GC MS and IR spectra of compound 3a

Signature SIF VIT VELLORE  
NS-A-2

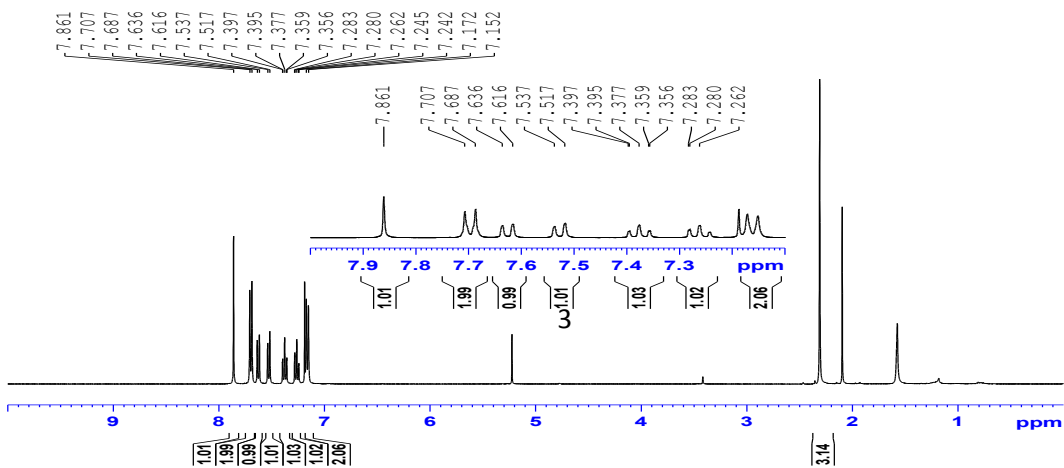

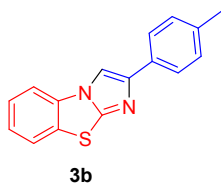

Signature SIF VIT VELLORE  
NS-A-2

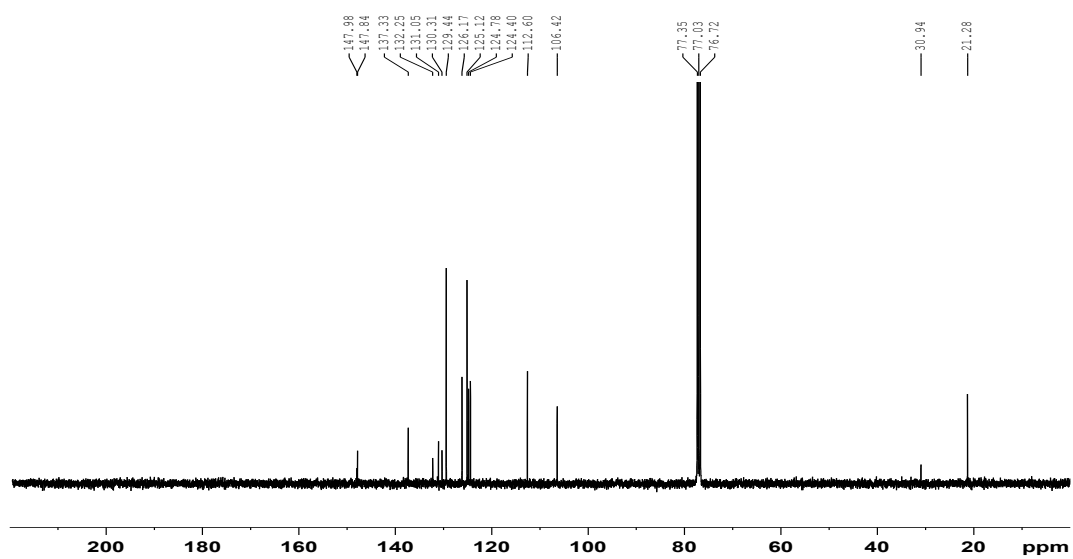

**<sup>1</sup>H and <sup>13</sup>C NMR spectrum of compound 3b in CDCl<sub>3</sub>**

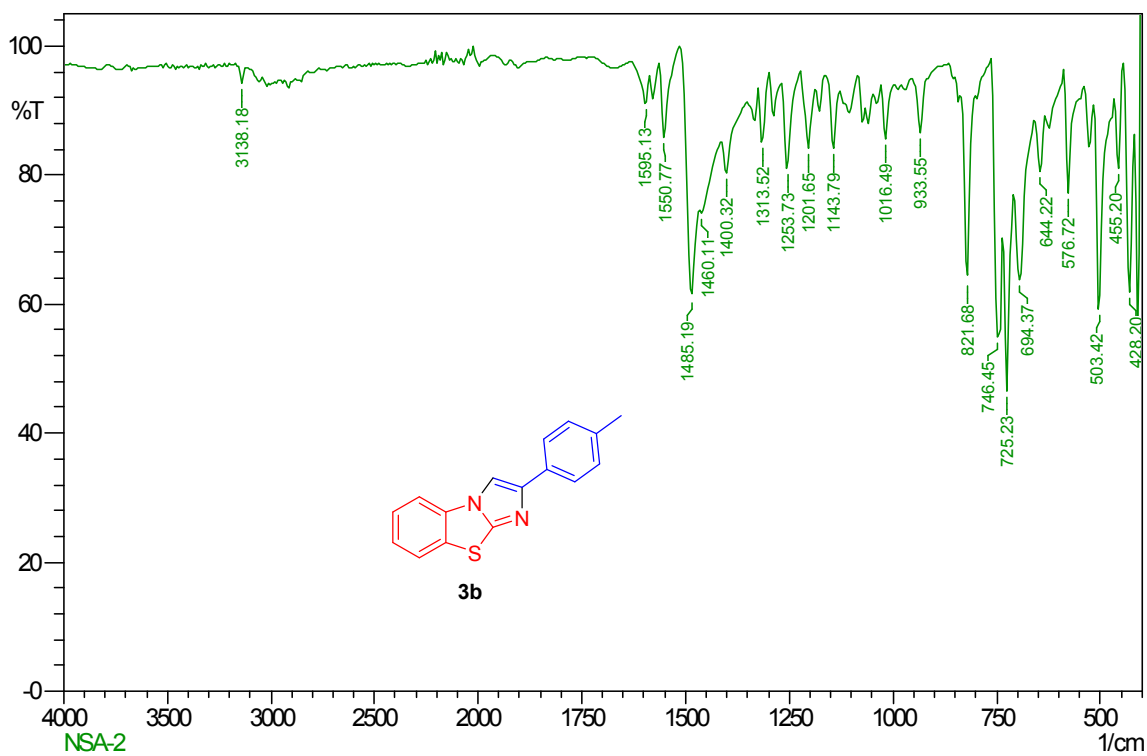

### IR spectra of compound 3b

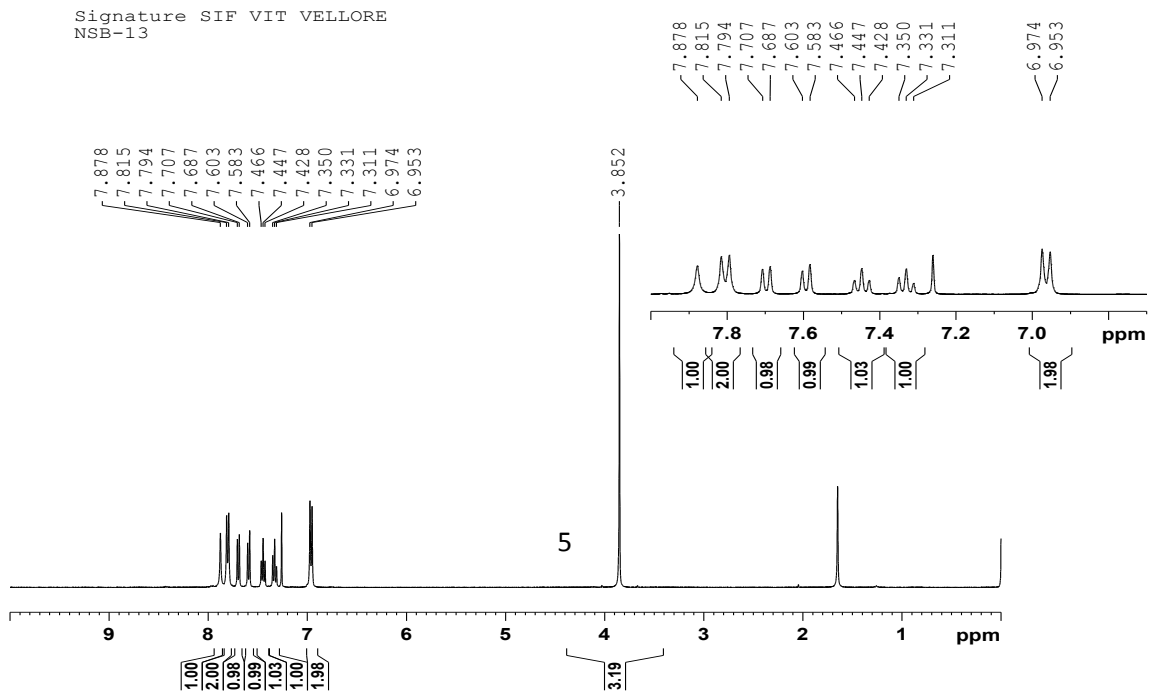

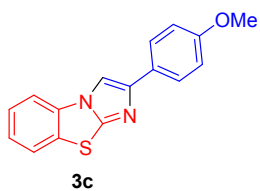

Signature SIF VIT VELLORE  
NSB-13

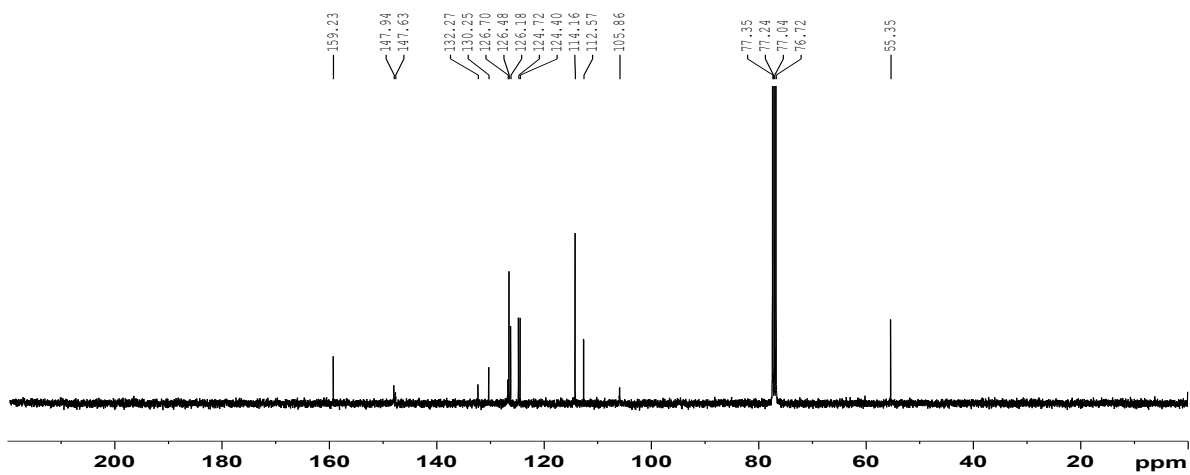

**<sup>1</sup>H and <sup>13</sup>C NMR spectrum of compound 3c in CDCl<sub>3</sub>**

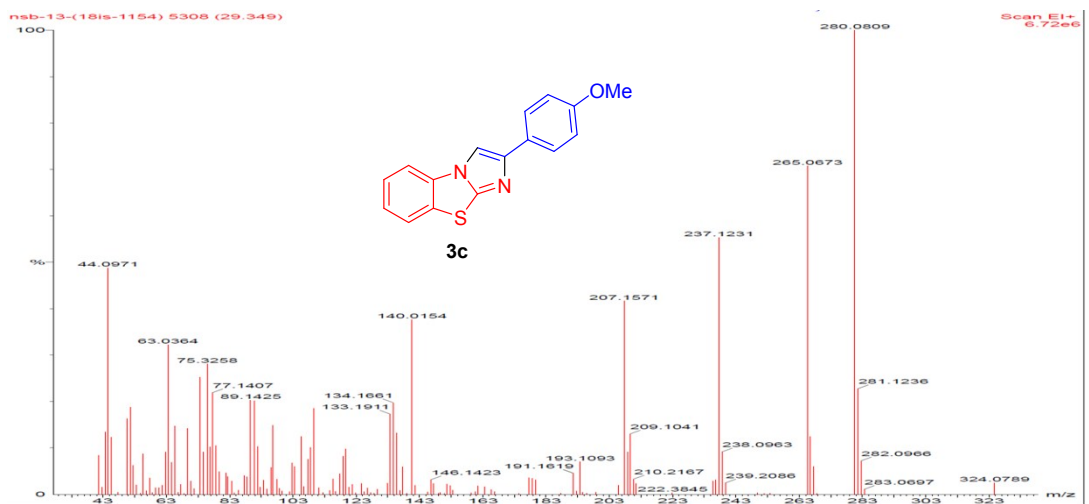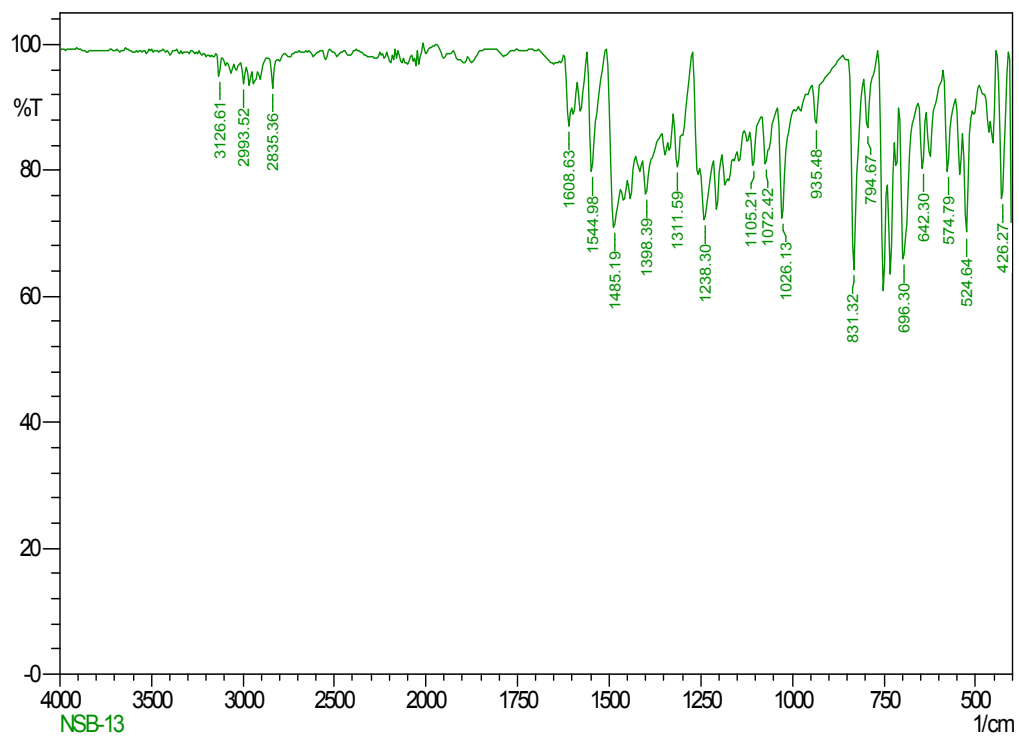

**GC MS and IR spectra of compound 3c**

Signature SIF VIT VELLORE  
NSB-5

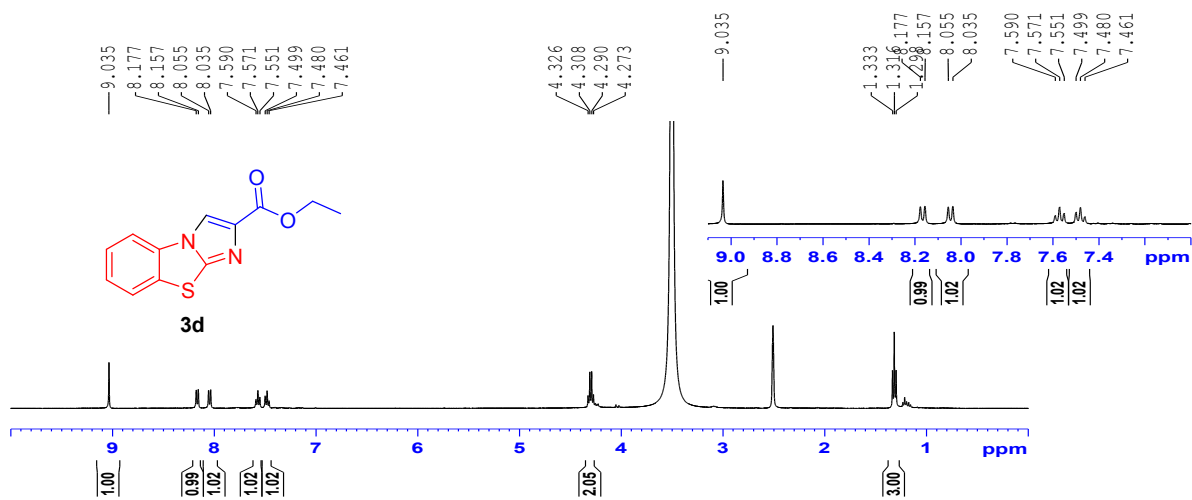

Signature SIF VIT VELLORE  
NSB-5

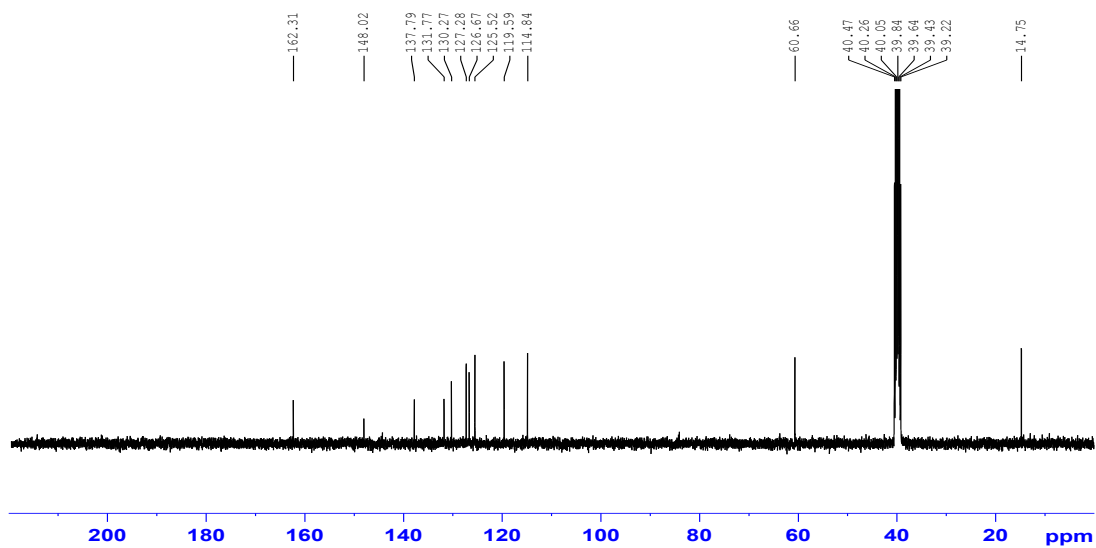

**<sup>1</sup>H and <sup>13</sup>C NMR spectrum of compound 3d in CDCl<sub>3</sub>**



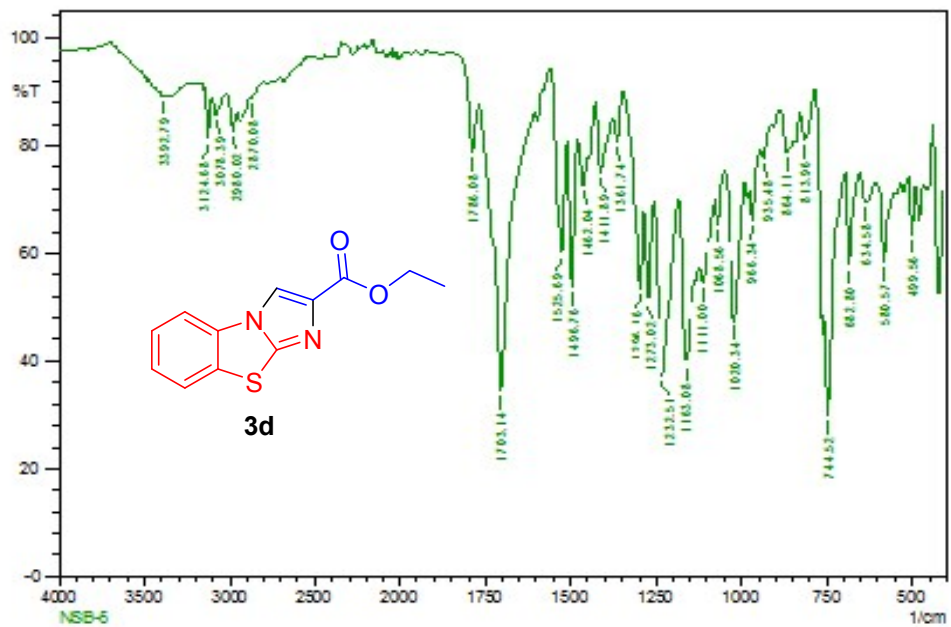

GC MS and IR spectra of compound 3d

Signature SIF VIT VELLORE  
NSB-15

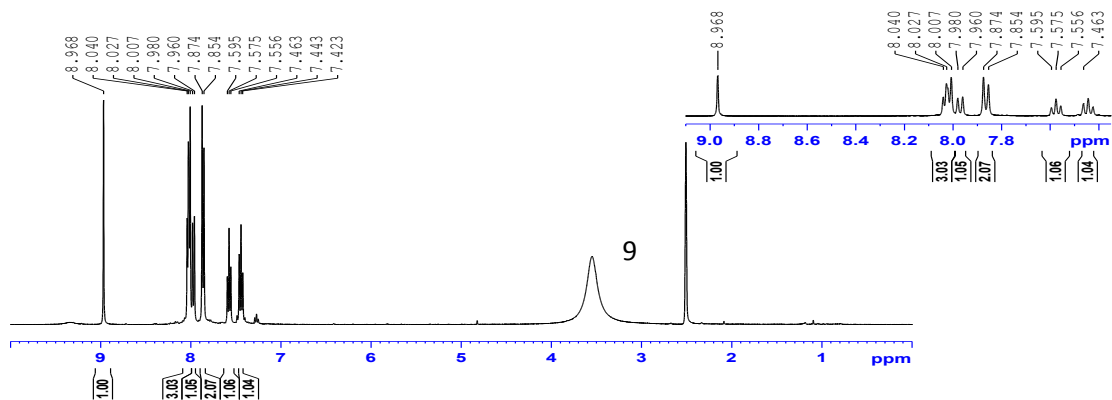

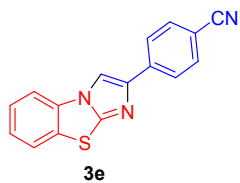

Signature SIF VIT VELLORE  
NSB-15

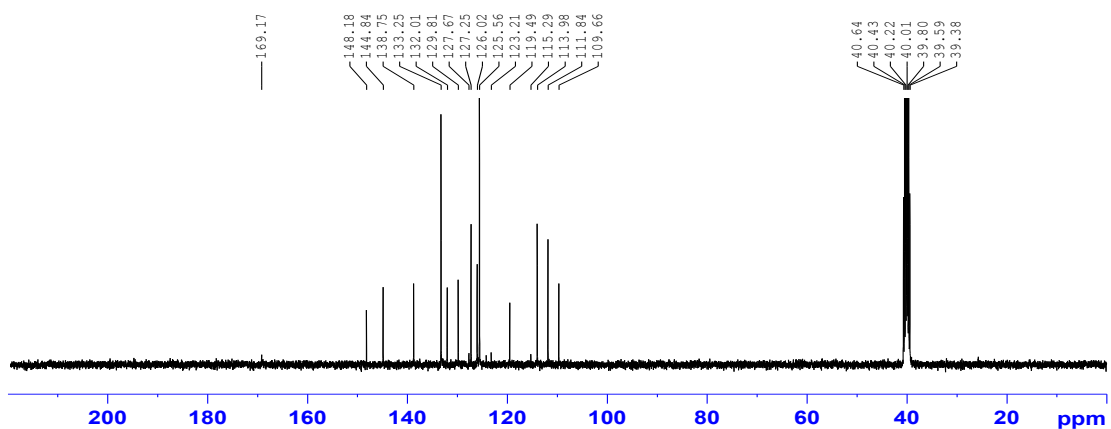

### <sup>1</sup>H and <sup>13</sup>C NMR spectrum of compound 3e in CDCl<sub>3</sub>

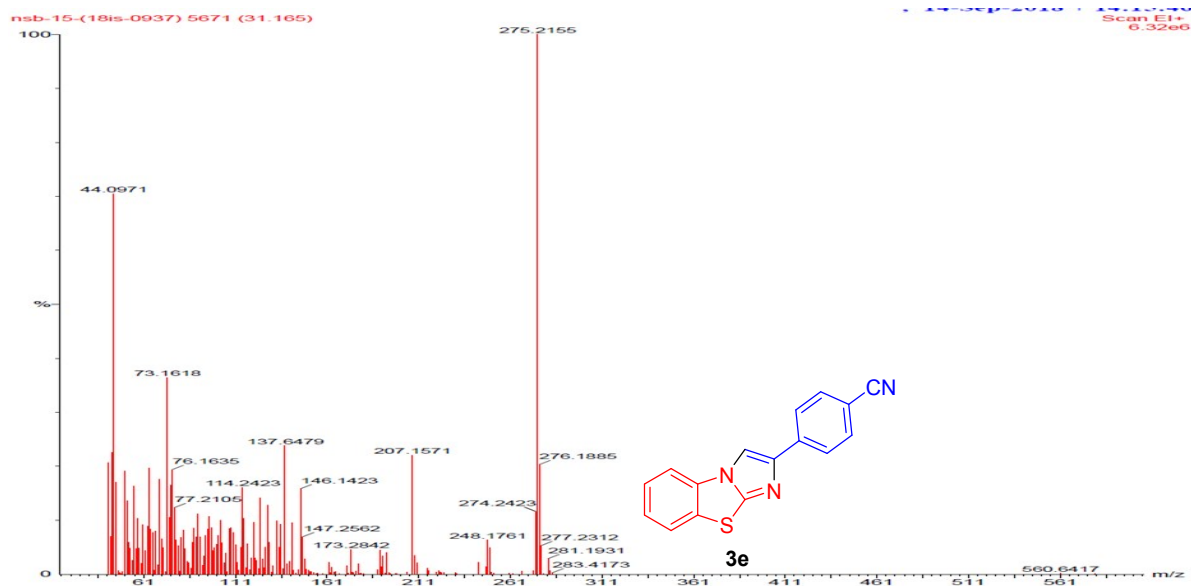

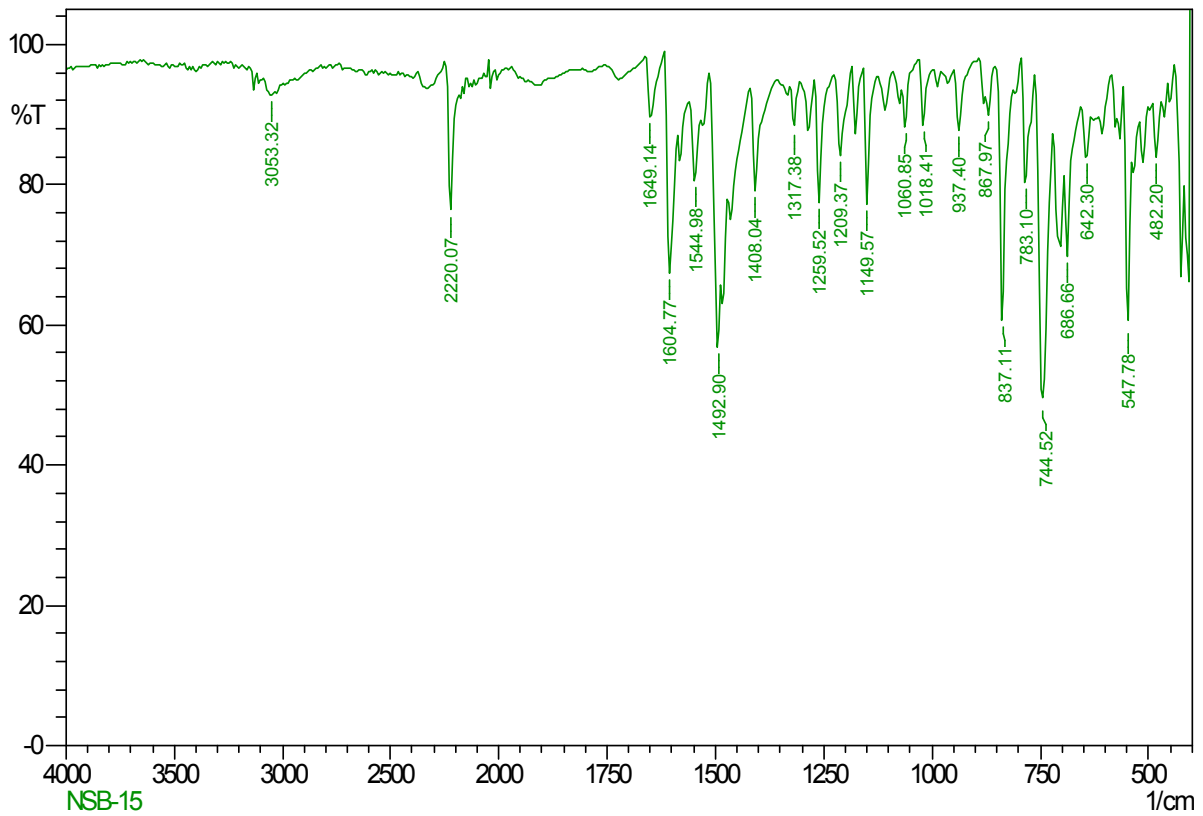

### GC MS and IR spectra of compound 3e

Signature SIF VIT VELLORE  
NSB-7

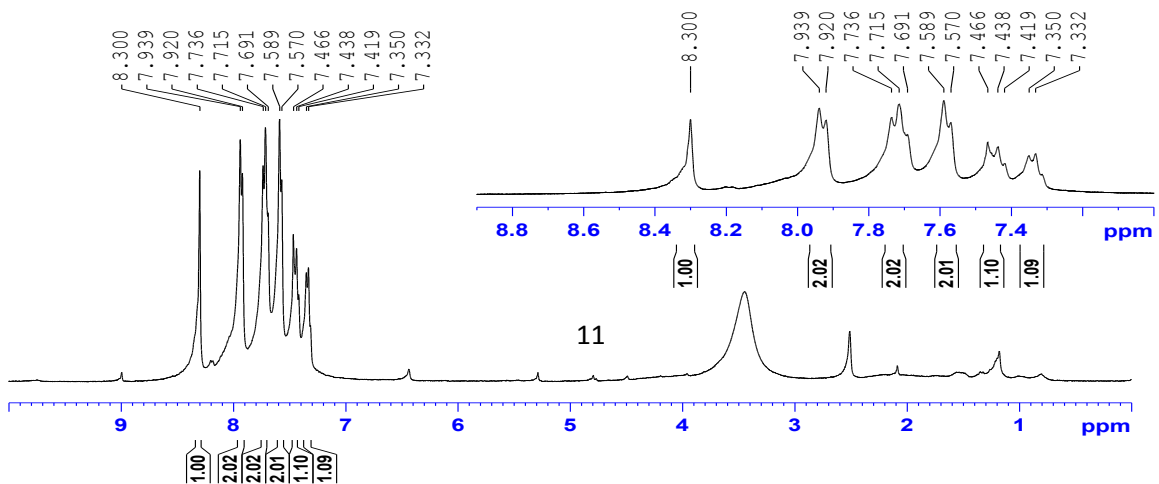

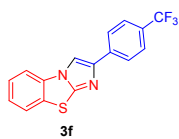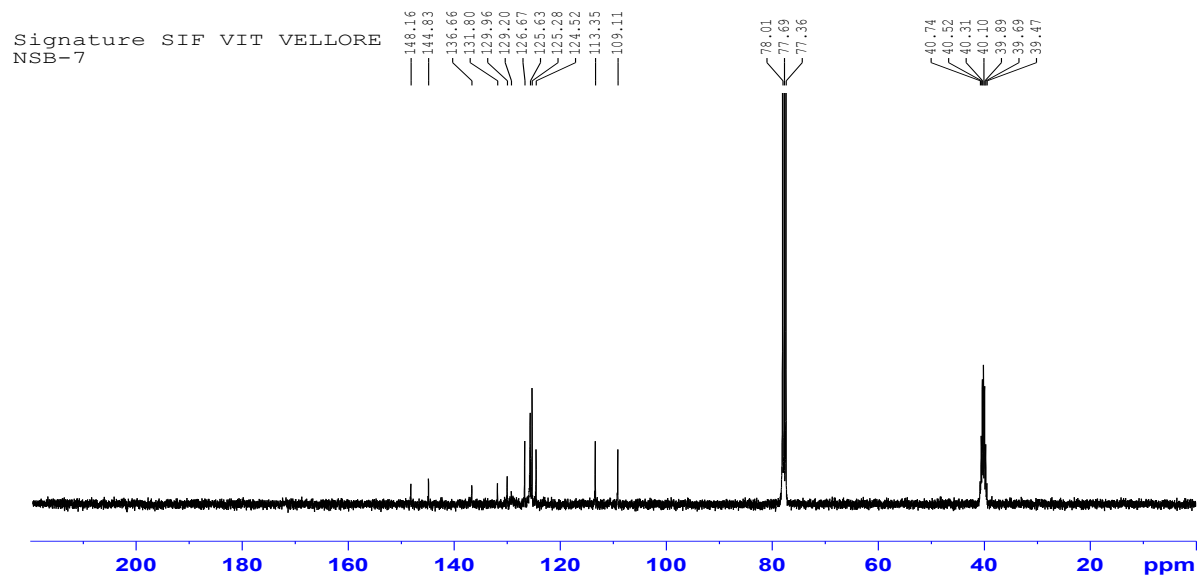

**$^1\text{H}$  and  $^{13}\text{C}$  NMR spectrum of compound 3f in  $\text{CDCl}_3$**

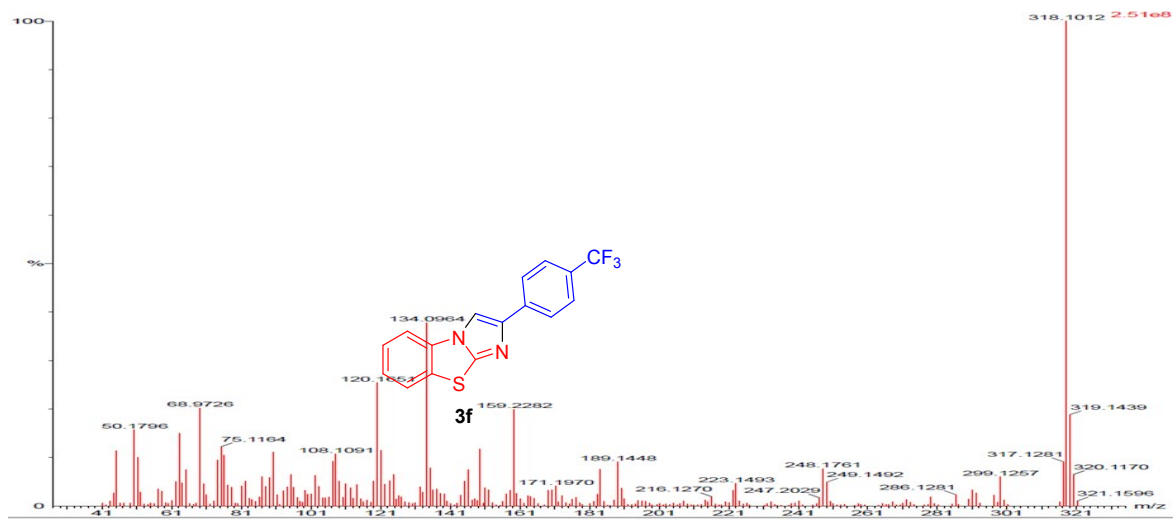

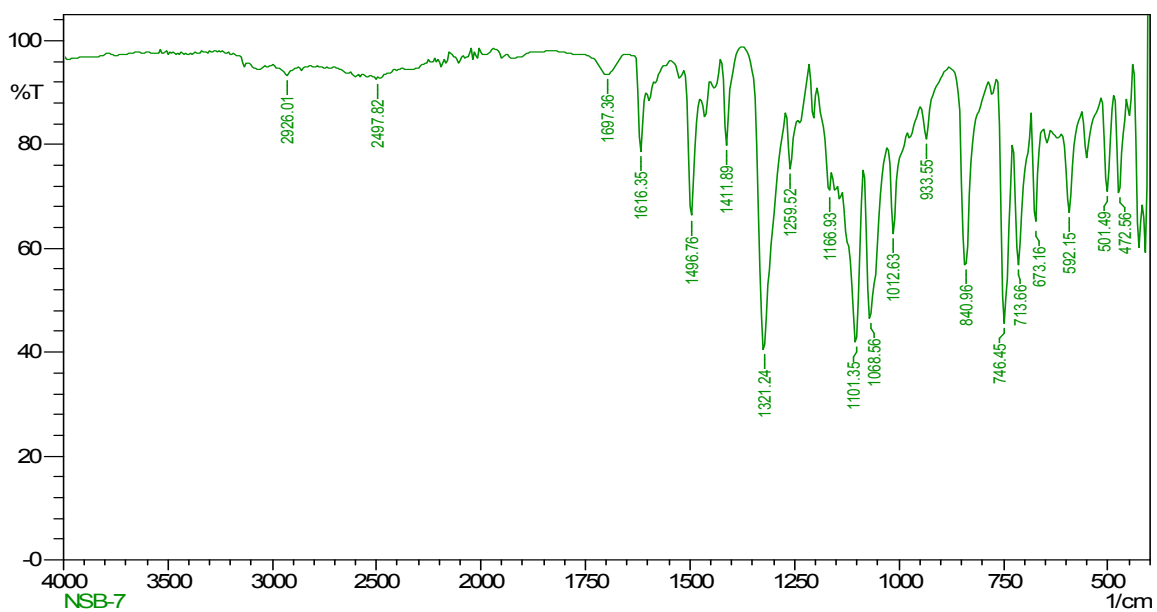

### GC MS and IR spectra of compound 3f

Signature SIF VIT VELLORE  
NSB-11

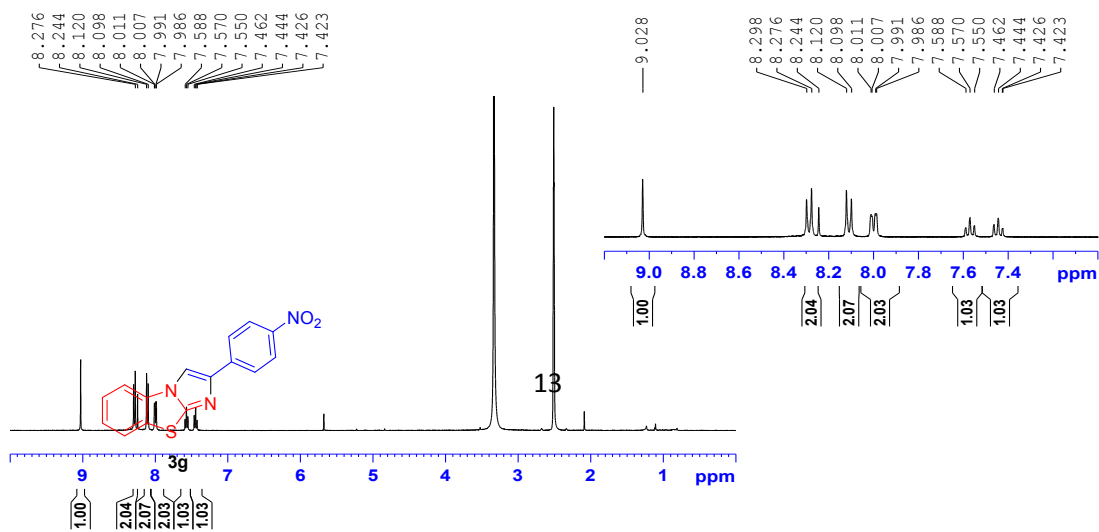

Signature SIF VIT VELLORE  
NSB-11

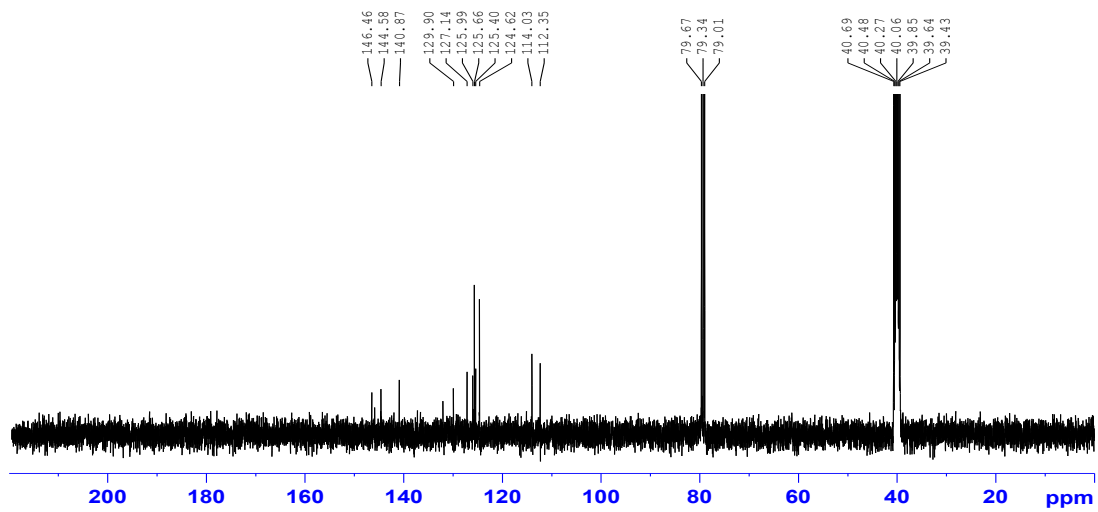

**<sup>1</sup>H and <sup>13</sup>C NMR spectrum of compound 3g in CDCl<sub>3</sub>**

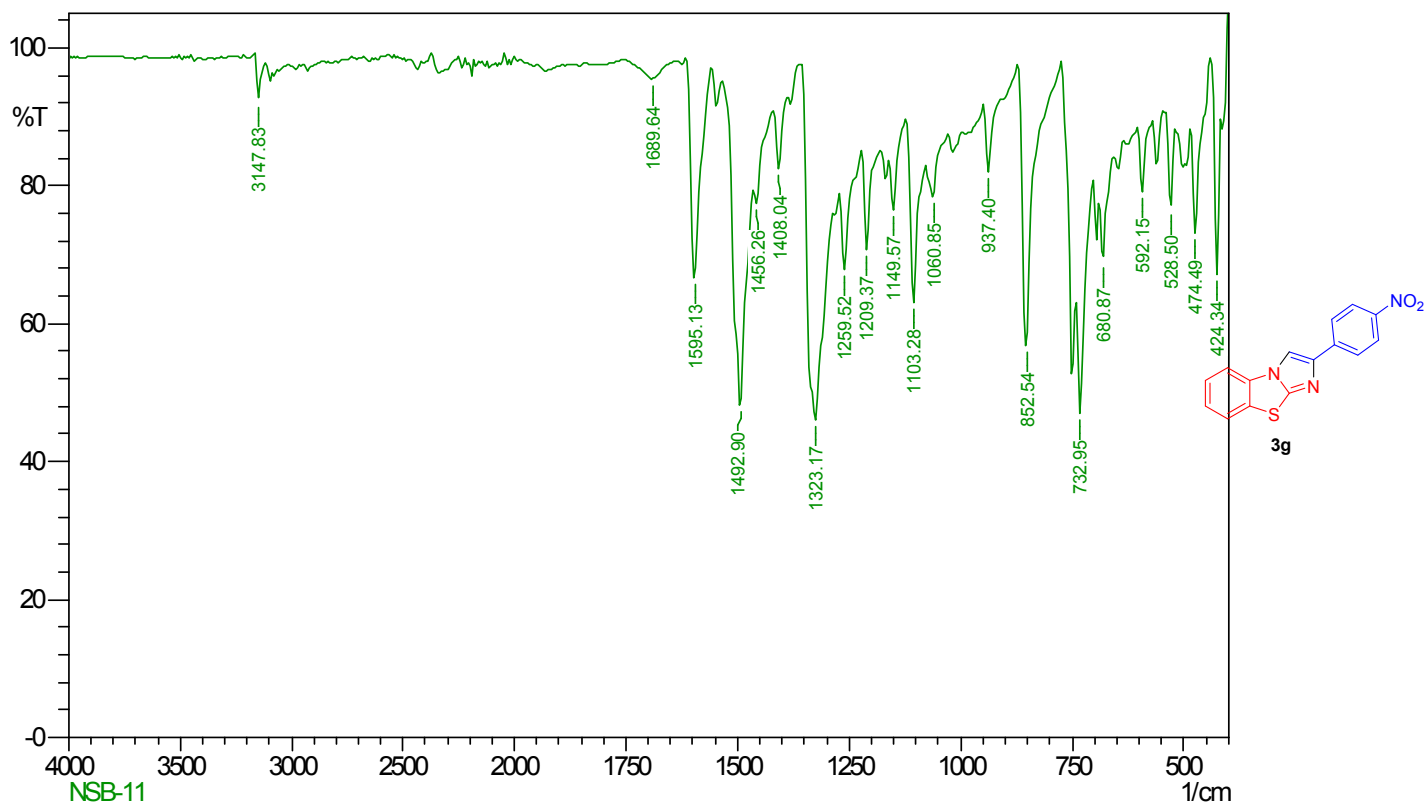

IR spectra of compound 3g

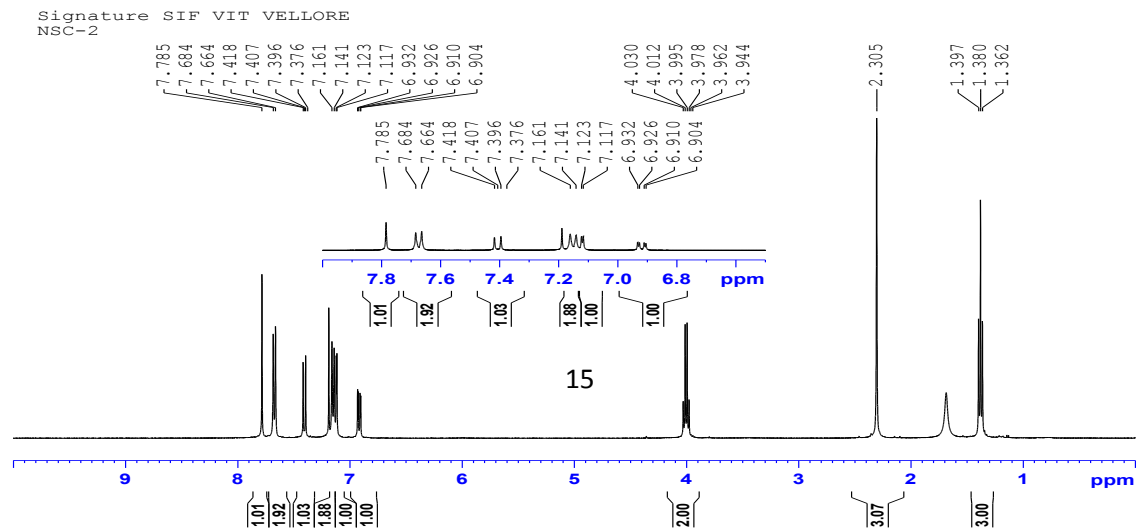

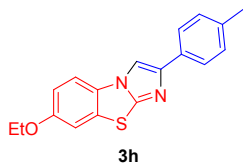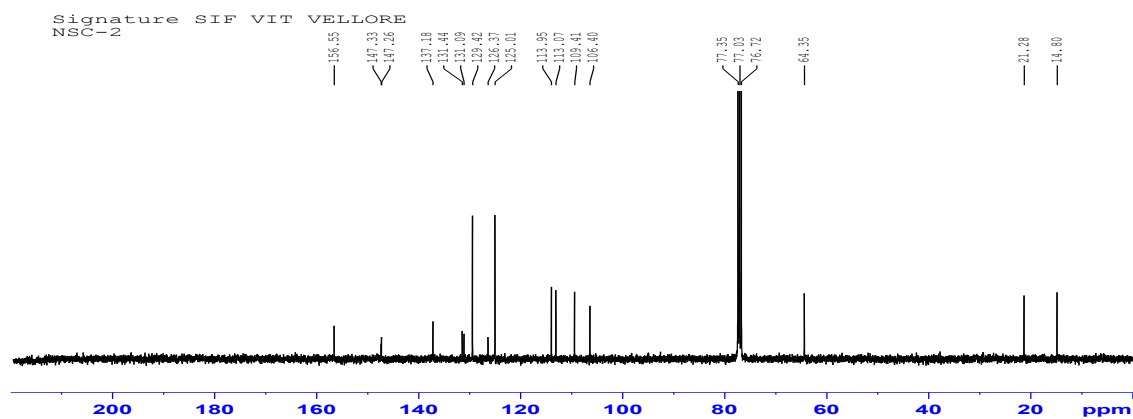

**$^1\text{H}$  and  $^{13}\text{C}$  NMR spectrum of compound 3h in  $\text{CDCl}_3$**

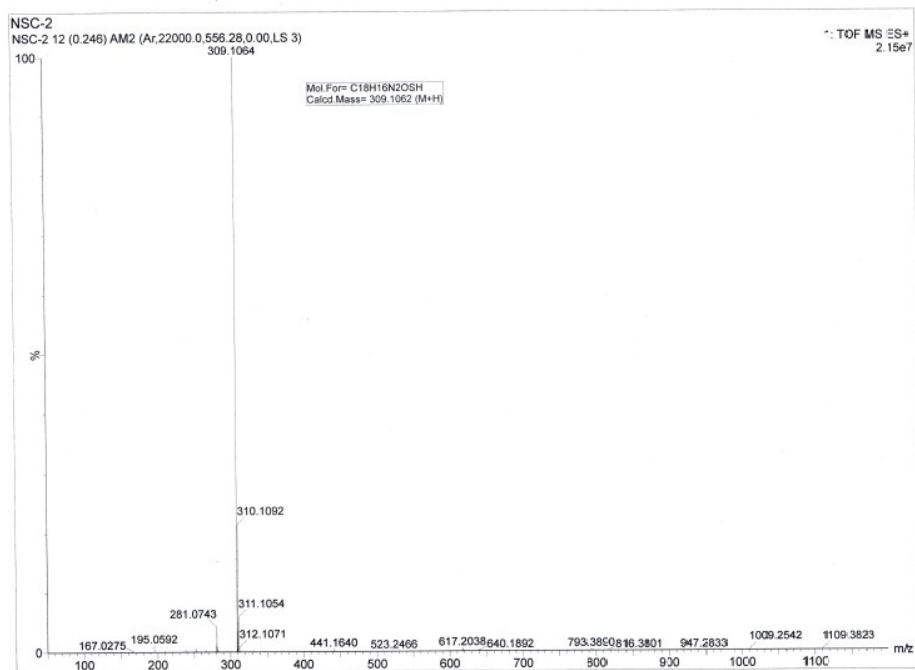



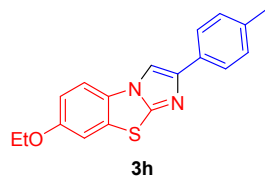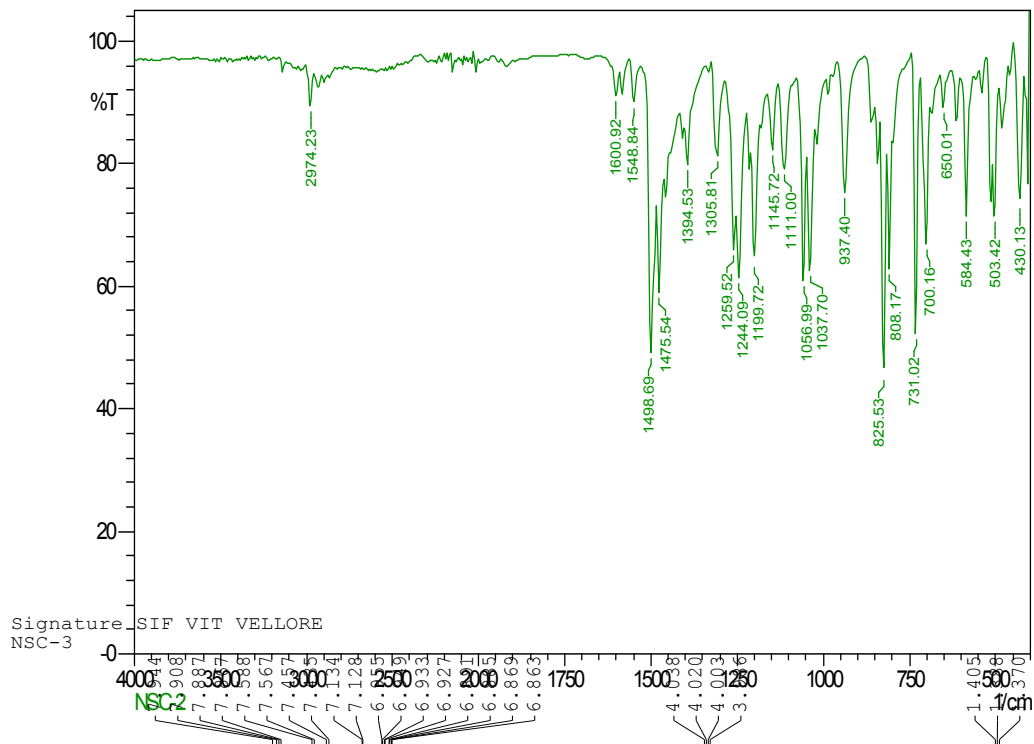

**HR MS**

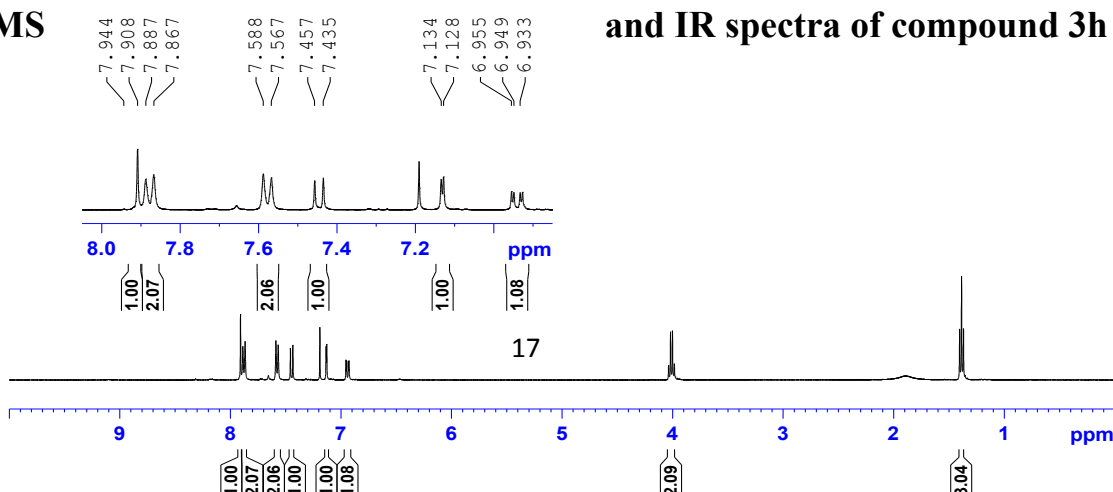

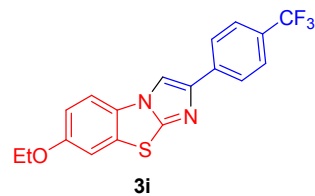

Signature SIF VIT VELLORE  
NSC-3

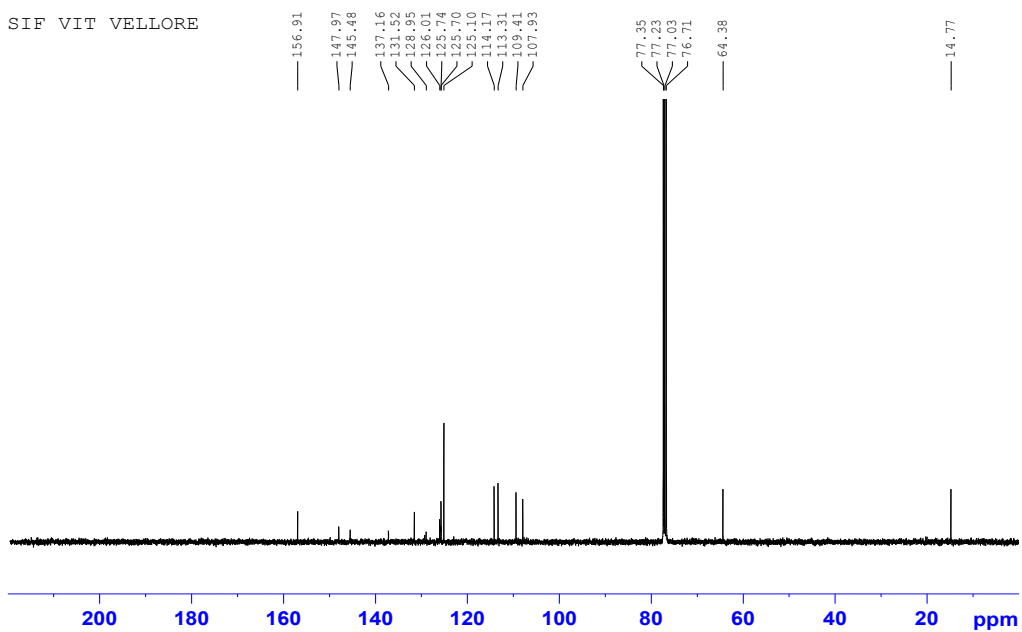

**<sup>1</sup>H and <sup>13</sup>C NMR spectrum of compound 3i in CDCl<sub>3</sub>**

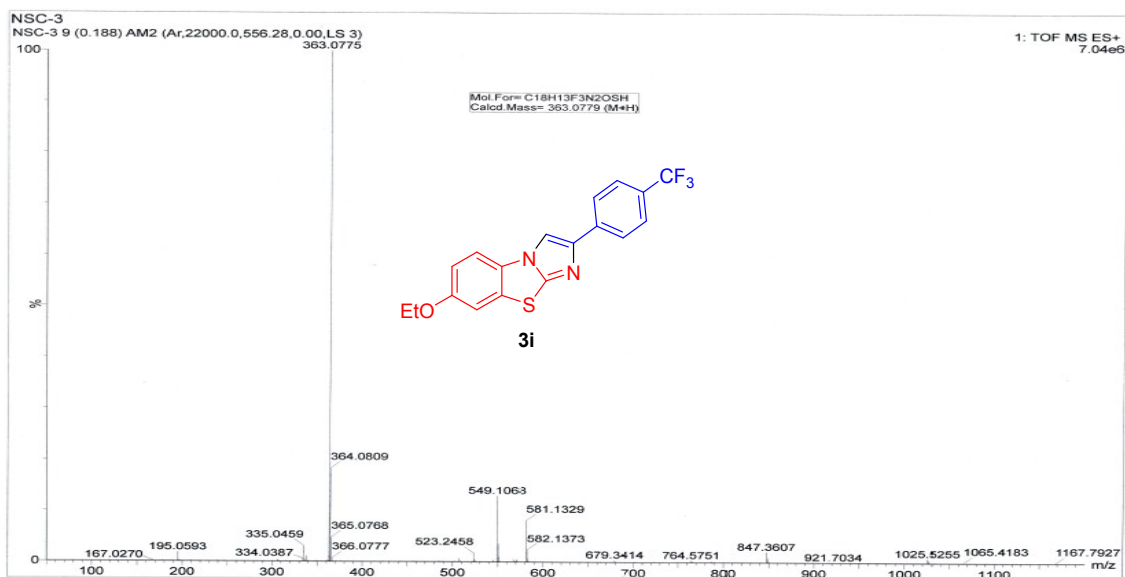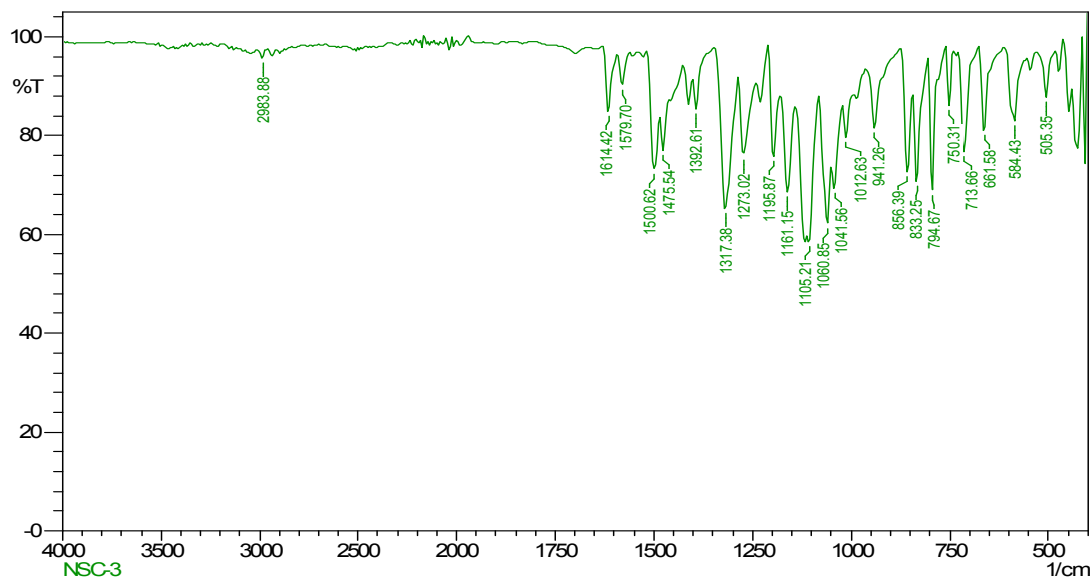

Signature SIF VIT VELLORE

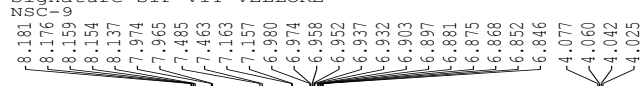

HR MS

and IR spectra of compound 3i

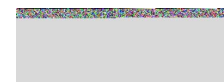

Current Data Parameters  
NAME NSC-9  
EXPNO 67  
PROCNO 1

F2 - Acquisition Parameters  
Date\_ 20180427  
Time 23.13 h  
INSTRUM spect  
PROBHD z108618\_0505 (4  
PULPROG zg30  
TD 65536  
SOLVENT CDCl3  
NS 16  
DS 2  
SWH 8012.820 Hz  
FIDRES 0.244532 Hz  
AQ 4.0894465 sec  
RG 127.79  
DW 62.400 usec  
DE 6.50 usec  
TE 301.1 K  
D1 1.00000000 sec  
SFO1 400.2604716 MHz  
NUC1 1H  
F1 14.27 usec  
FLW1 15.00000000 W

F2 - Processing parameters  
SI 65536  
SF 400.2580105 MHz  
WDW EM  
SSB 0  
LB 0.30 Hz  
GB 0  
PC 1.00

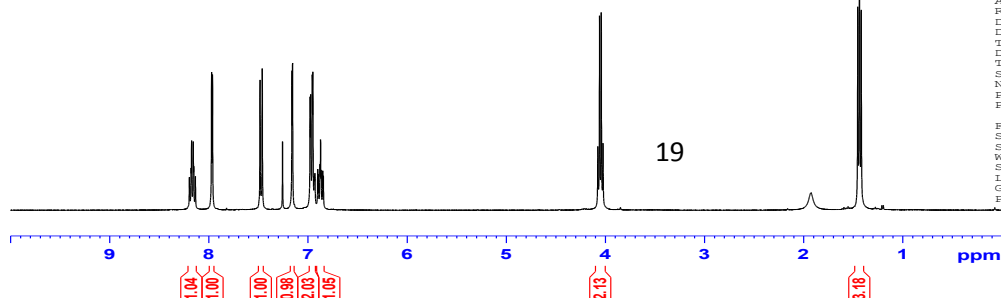

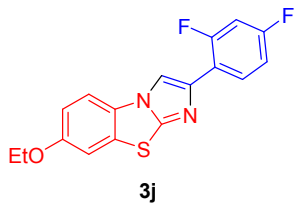

Signature SIF VIT VELLORE  
NSC-9

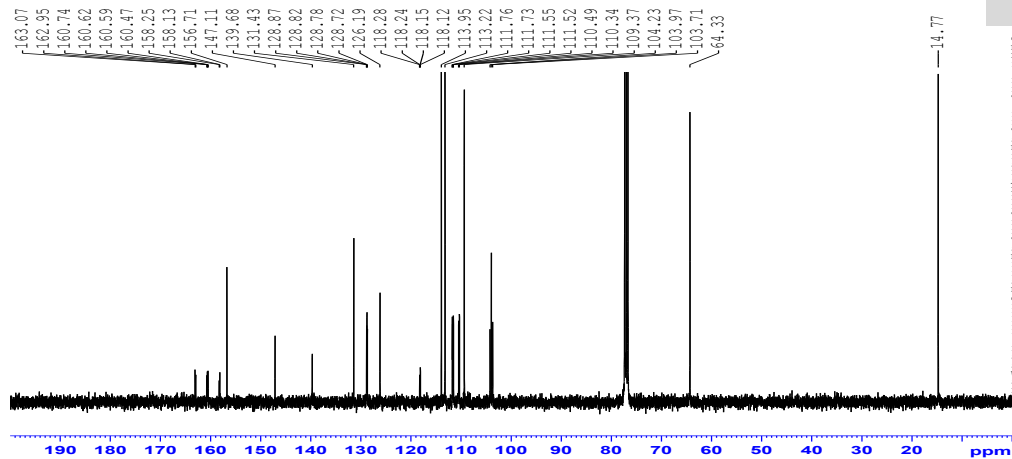

```

Current Data Parameters
NAME          NSC-9
EXPNO         68
PROCNO        1
F2 - Acquisition Parameters
Date_         20180427
Time          21.42 h
INSTRUM       spect
PROBRD        Z108618_0505
PULPROG       zgpg30
TD            65536
SOLVENT       CDCl3
NS            512
DS            4
SWH           24038.461 Hz
FIDRES        0.733586 Hz
AQ            1.3631488 sec
RG            199.6
DW            20.800 usec
DE            6.30 usec
TE            301.6 K
D1            2.0000000 sec
D11           0.0300000 sec
TD0           1
SFO1          100.6250186 MHz
NUC1           13C
P1            9.80 usec
PL1           58.0000000 W
SFO2          400.2596010 MHz
NUC2           1H
CPDPRG2       waltz16
PCPD2         90.00 usec
PLM2          15.0000000 W
PLM12         0.3770988 W
PLM13         0.3868000 W
F2 - Processing parameters
SI            32768
SF            100.6250186 MHz
WDW           EM
SSB           0
LB            1.00 Hz
GB            0
CB            1.40

```

**$^1\text{H}$  and  $^{13}\text{C}$  NMR spectrum of compound 3j in  $\text{CDCl}_3$**

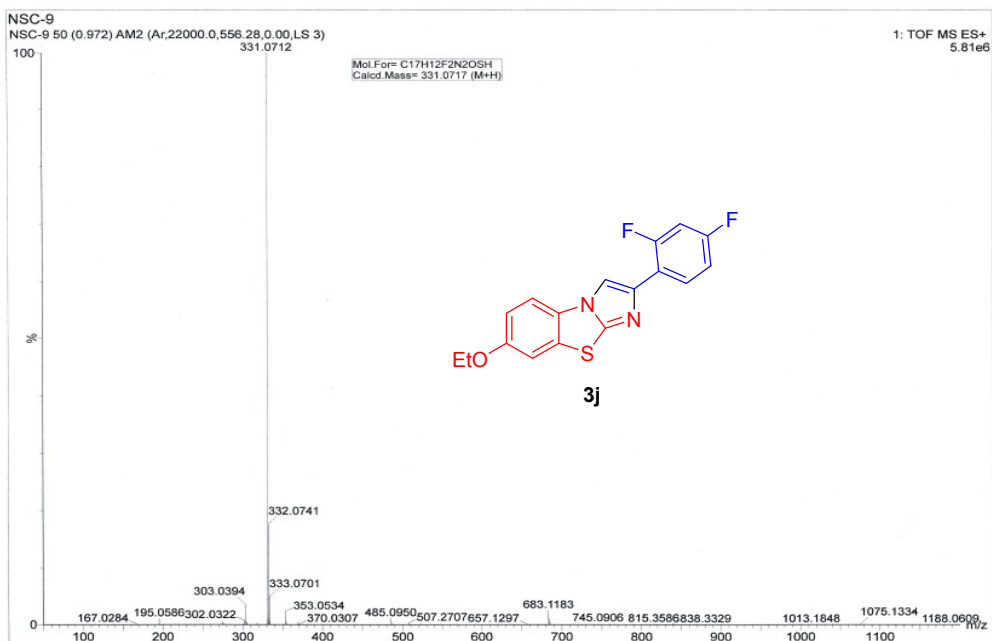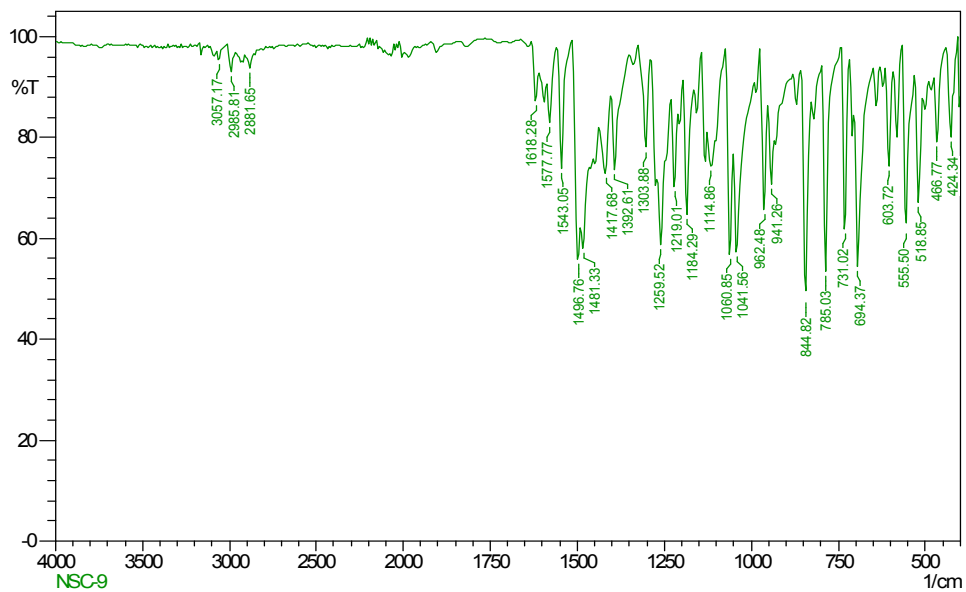

HR MS and IR spectra of compound 3j

Signature SIF VIT VELLORE  
NSB-3

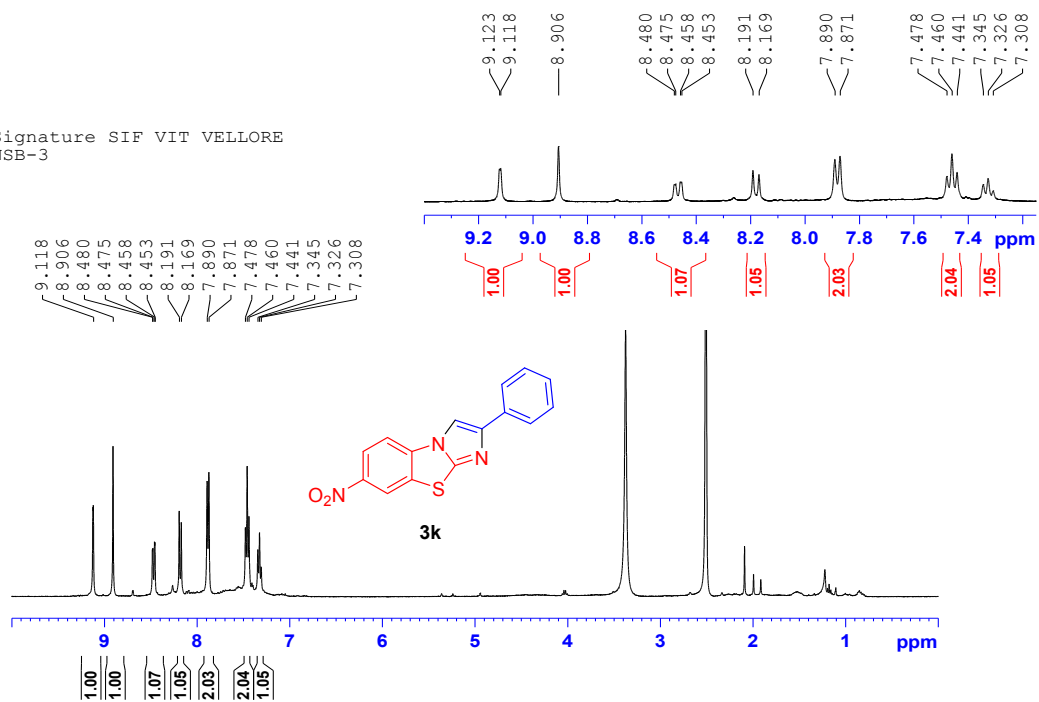

Signature SIF VIT VELLORE  
NSB-3

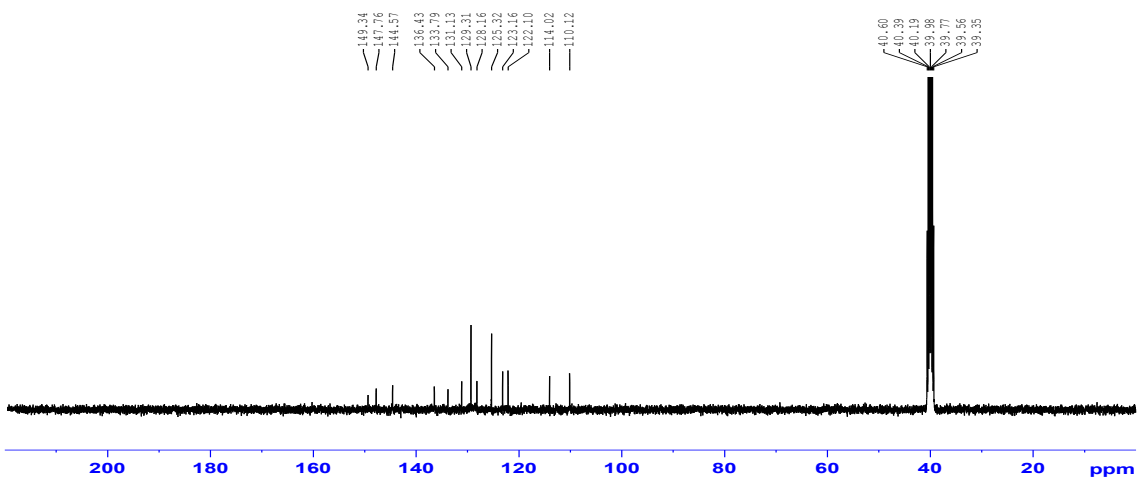

<sup>1</sup>H and <sup>13</sup>C NMR spectrum of compound 3k in CDCl<sub>3</sub>

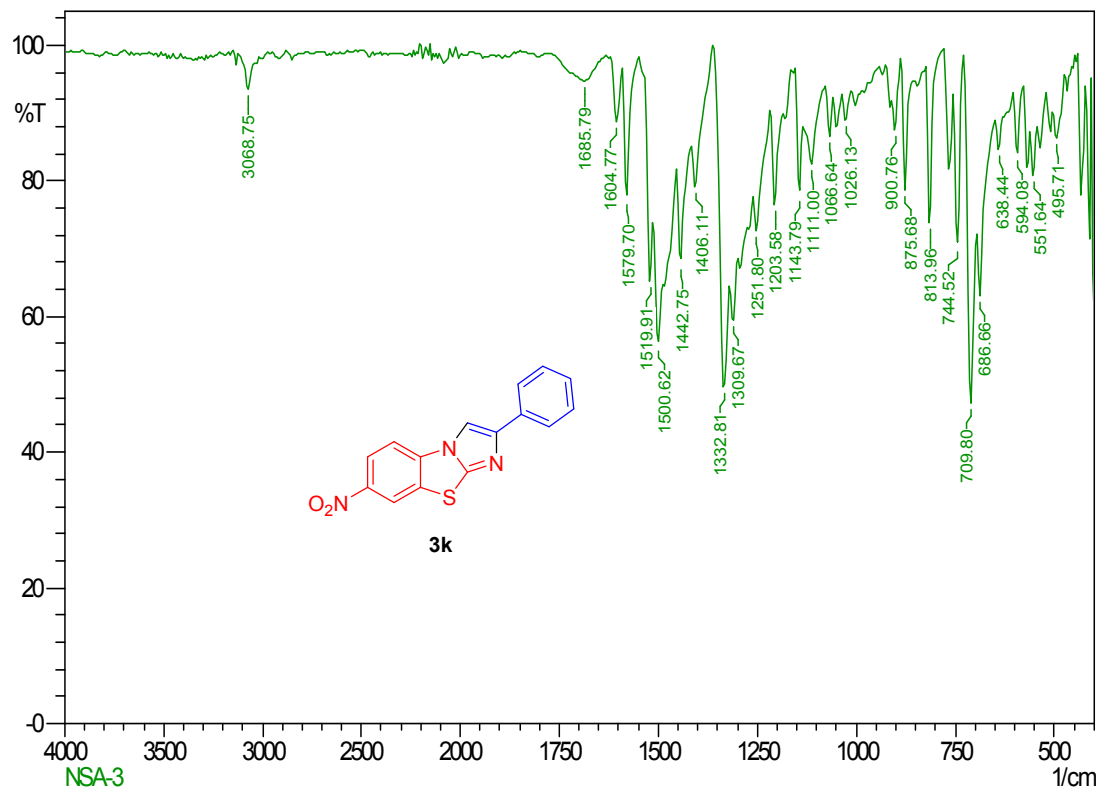

**IR spectra of compound 3k**

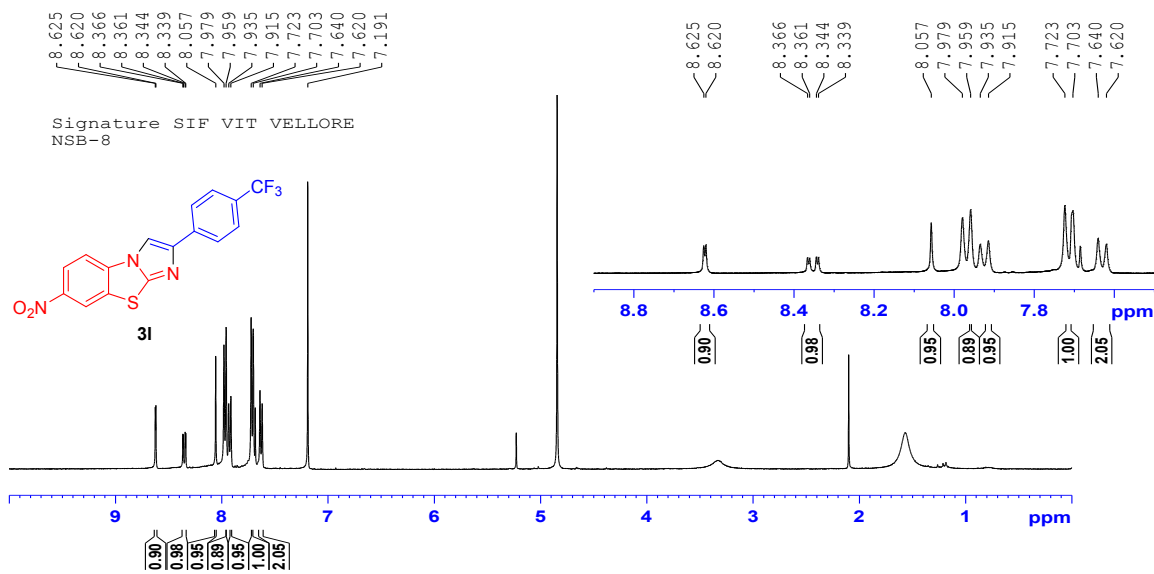

Signature SIF VIT VELLORE  
NSB-8

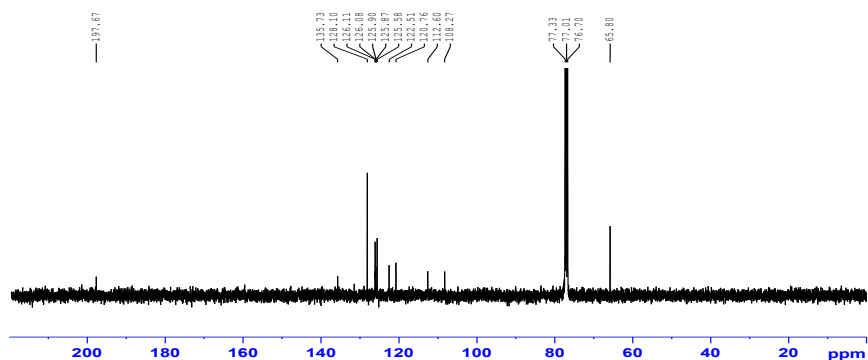

```

Current Data Parameters
NAME          NSB-8
EXPNO        54
PROCNO       1

F2 - Acquisition Parameters
Date_        20180324
Time         16.38 h
INSTRUM     spect
PROBHD      Z108618_0505 (
PULPROG     zgpg30
TD          65536
SOLVENT     CDCl3
NS          512
DS          4
SWH         24038.461 Hz
FIDRES     0.733596 Hz
AQ         1.3631488 sec
RG         499.6
DW         20.800 usec
DE         6.50 usec
TE         302.8 K
D1         2.00000000 sec
D11        0.03000000 sec
TDO        1
SF01       100.6550186 MHz
NUC1       13C
P1         9.80 usec
PLW1       58.00000000 W
SF02       400.2596010 MHz
NUC2       1H
CPDPRG2    waltz16
PCPD2      90.00 usec
PLW2       15.00000000 W
PLW12      0.37709999 W
PLW13      0.18968000 W

F2 - Processing parameters
SI         32768
SF         100.6449542 MHz
WDW        EM
SSB        0
LB         1.00 Hz
GB         0
PC         1.40
  
```

**<sup>1</sup>H and <sup>13</sup>C NMR spectrum of compound 3l in CDCl<sub>3</sub>**



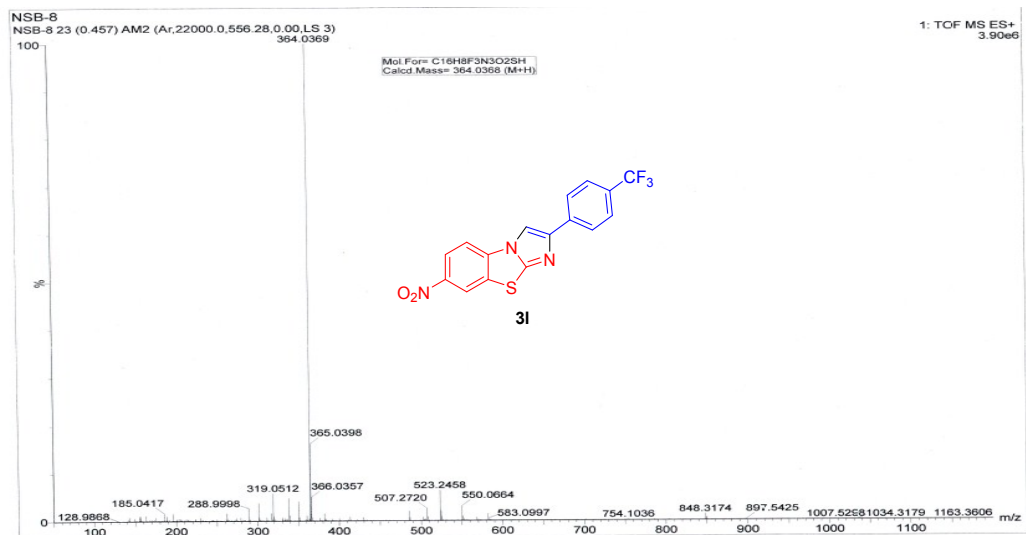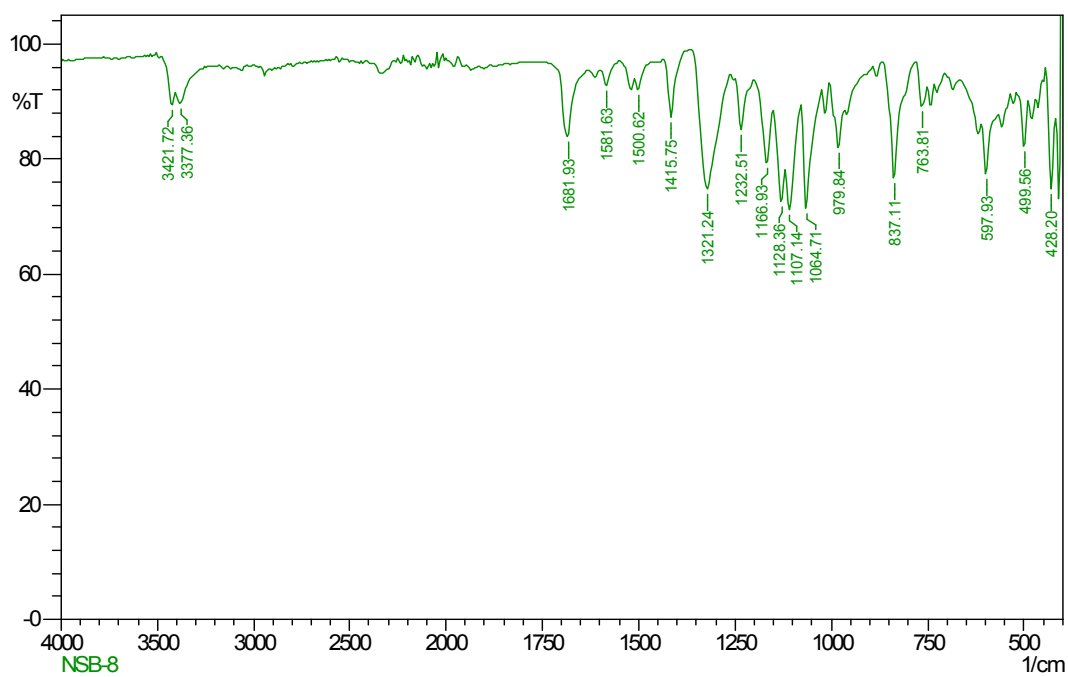

**HR MS and IR spectra of compound 31**

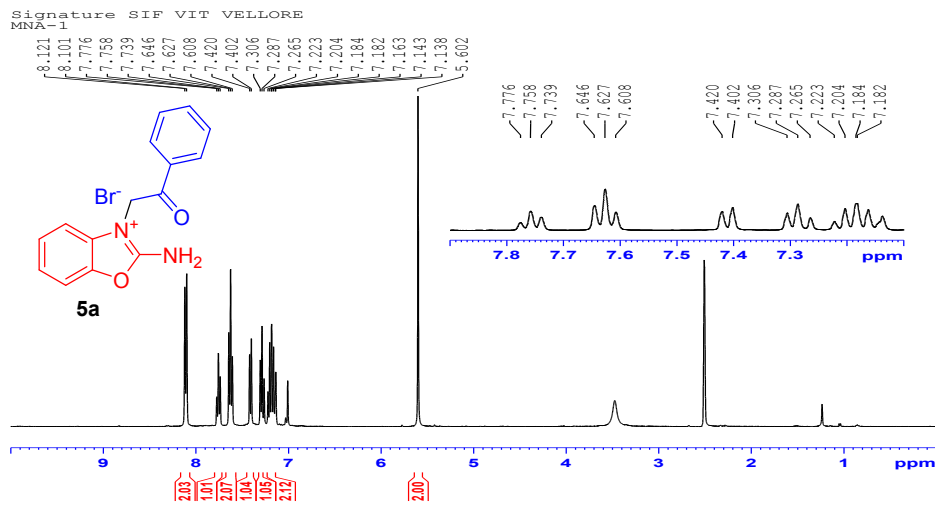

```

Current Data Parameters
NAME      NSR
EXPNO    45
PROCNO   1

F2 - Acquisition Parameters
Date_    20191126
Time     23.47 h
INSTRUM  spect
PROBHD   z108618_0505 (
PULPROG  zgpg30
TD       65536
SOLVENT  DMSO
NS       16
DS       2
SWH      8012.820 Hz
FIDRES   0.244532 Hz
AQ       4.089445 sec
RG       127.79
DW       62.400 usec
DE       6.50 usec
TE       297.8 K
D1       1.00000000 sec
TDO      1
NUC1     13C
SFO1     400.2604716 MHz
F1       14.00 usec
FLW1     16.00000000 W

SF - Processing parameters
SI       65536
SF       400.2580000 MHz
WDW      EM
SSB      0
LB       0.30 Hz
GB       0
PC       1.00
  
```

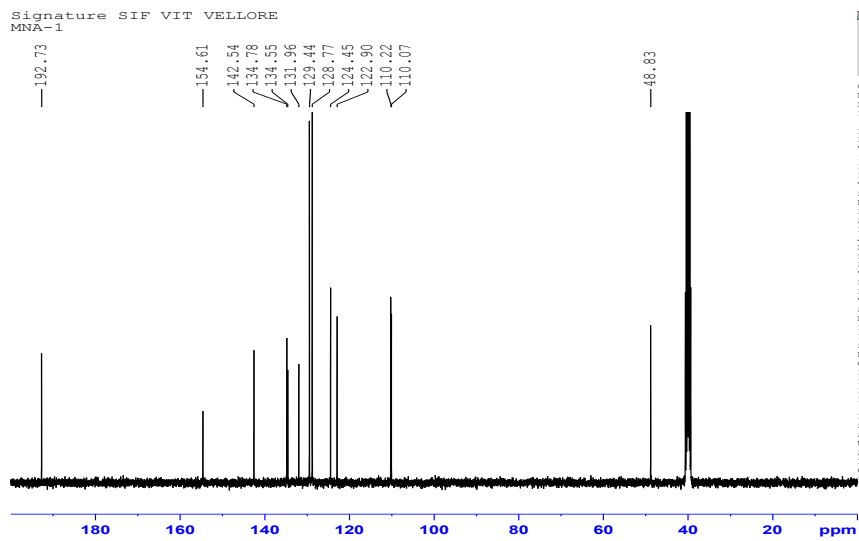

```

Current Data Parameters
NAME      NSR
EXPNO    46
PROCNO   1

F2 - Acquisition Parameters
Date_    20191127
Time     0.17 h
INSTRUM  spect
PROBHD   z108618_0505 (
PULPROG  zgpg30
TD       65536
SOLVENT  DMSO
NS       512
DS       4
SWH      24038.461 Hz
FIDRES   0.733596 Hz
AQ       1.3631488 sec
RG       199.6
DW       20.800 usec
DE       6.50 usec
TE       298.3 K
D1       2.00000000 sec
D11      0.03000000 sec
TDO      100.6550195 MHz
NUC1     13C
SFO1     400.259610 MHz
F1       9.80 usec
FLW1     58.00000000 W
SFO2     400.259610 MHz
NUC2     1H
CPDPRG2  waltz16
PCPD2    90.00 usec
PLW2     16.00000000 W
PLW12    0.38716000 W
PLW13    0.19474000 W

F2 - Processing parameters
SI       32768
SF       100.6449542 MHz
WDW      EM
SSB      0
LB       1.00 Hz
GB       0
PC       1.40
  
```

<sup>1</sup>H and <sup>13</sup>C NMR spectrum of compound 5a in CDCl<sub>3</sub>

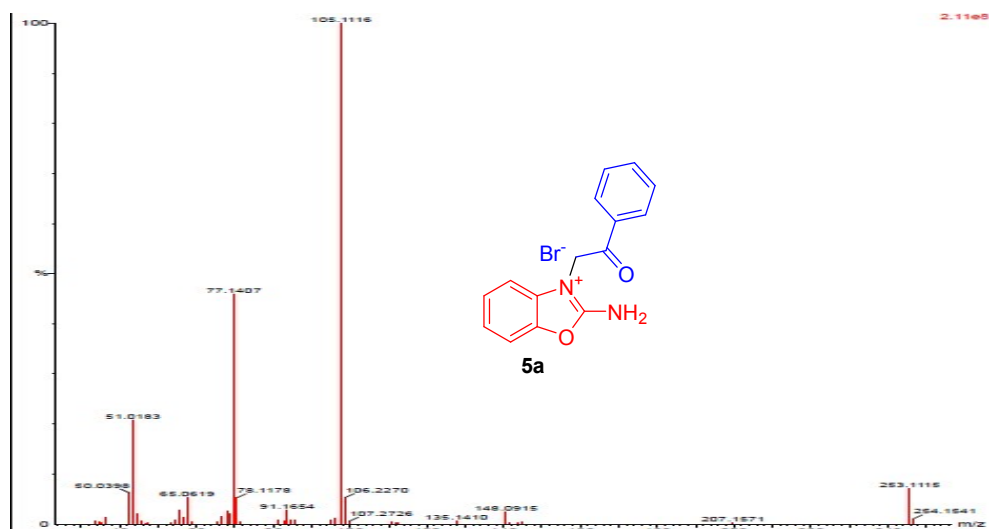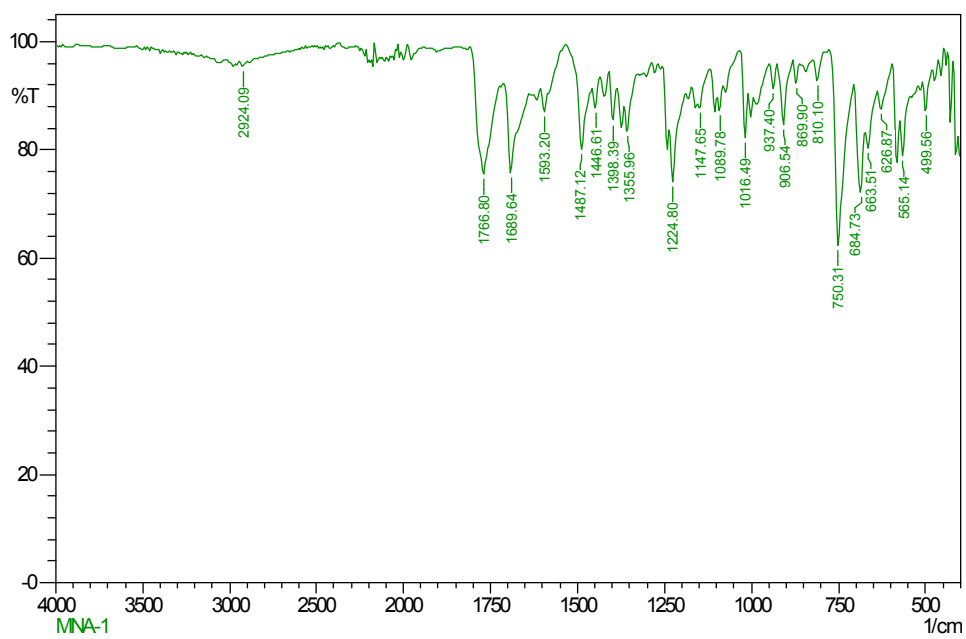

**GC MS and IR spectra of compound 5a**

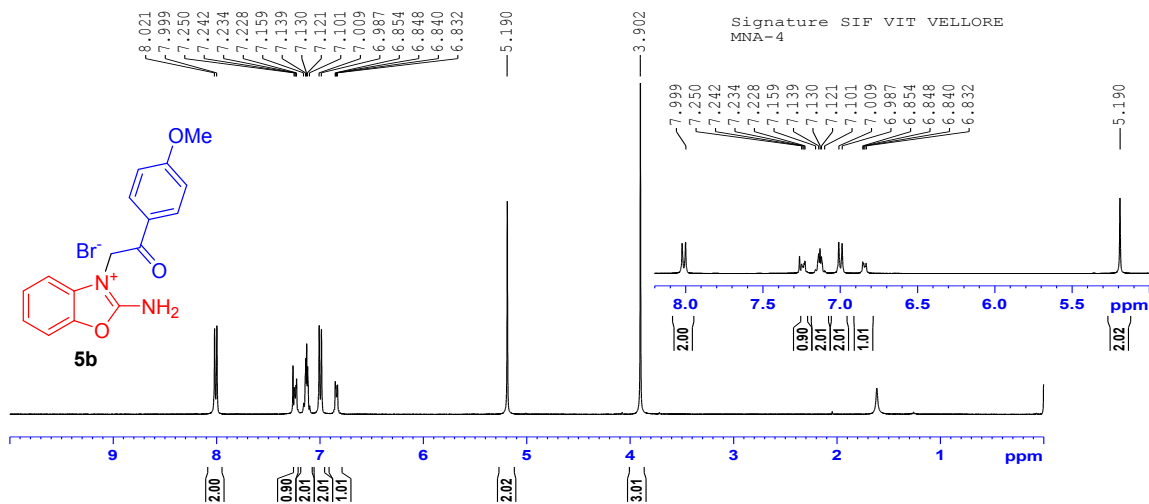

Signature SIF VIT VELLORE  
MNA-4

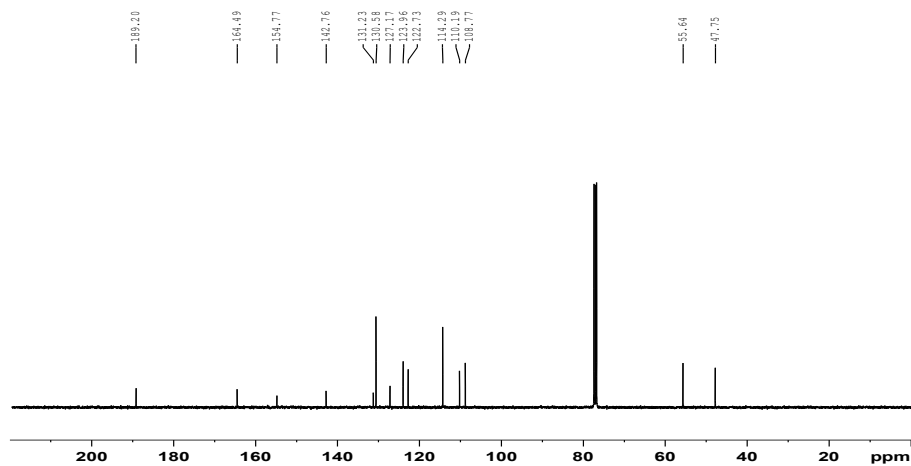

Current Data Parameters  
NAME MNA-4  
EXPNO 14  
PROCNO 1

F2 - Acquisition Parameters  
Date\_ 20180522  
Time\_ 19.46 h  
INSTRUM spect  
PROBHD Z108618\_0505 (   
PULPROG zgpg30  
TD 65536  
SOLVENT CDCl3  
NS 512  
DS 4  
SWH 24038.461 Hz  
FIDRES 0.733596 Hz  
AQ 1.3631488 sec  
RG 156.91  
DW 20.800 usec  
DE 6.50 usec  
TE 299.1 K  
D1 2.0000000 sec  
D11 0.0300000 sec  
TDO 100.6550186 MHz  
SFO1 13C  
NUC1 13C  
P1 9.80 usec  
PLW1 58.0000000 W  
SFO2 400.2596010 MHz  
NUC2 1H  
CPDPRG2 waltz16  
PCPD2 90.00 usec  
PLW2 15.0000000 W  
PLW12 0.37709999 W  
PLW13 0.18968000 W

F2 - Processing parameters  
SI 32768  
SF 100.6449542 MHz  
WDW EM  
SSB 0  
LB 1.00 Hz  
GB 0  
PC 1.40

**<sup>1</sup>H and <sup>13</sup>C NMR spectrum of compound 5b in CDCl<sub>3</sub>**

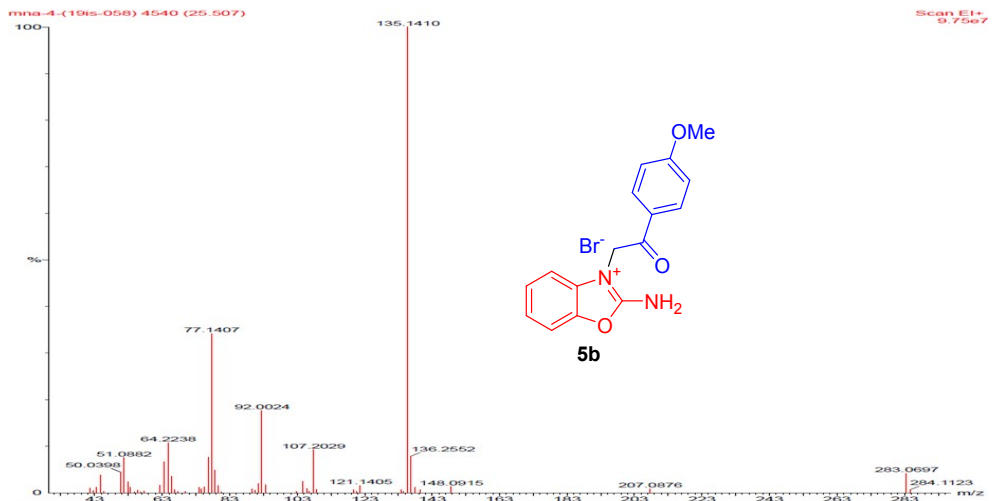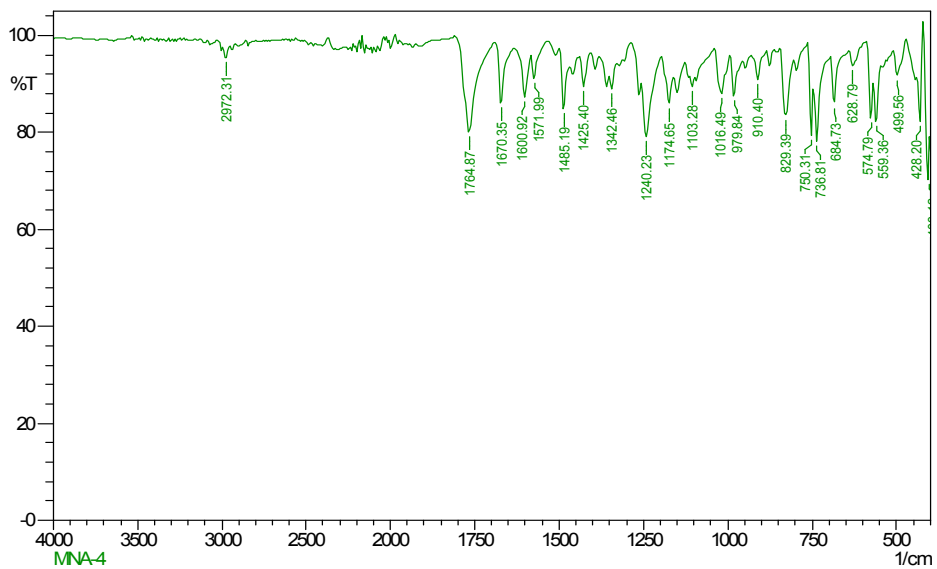

**GC MS and IR spectra of compound 5b**

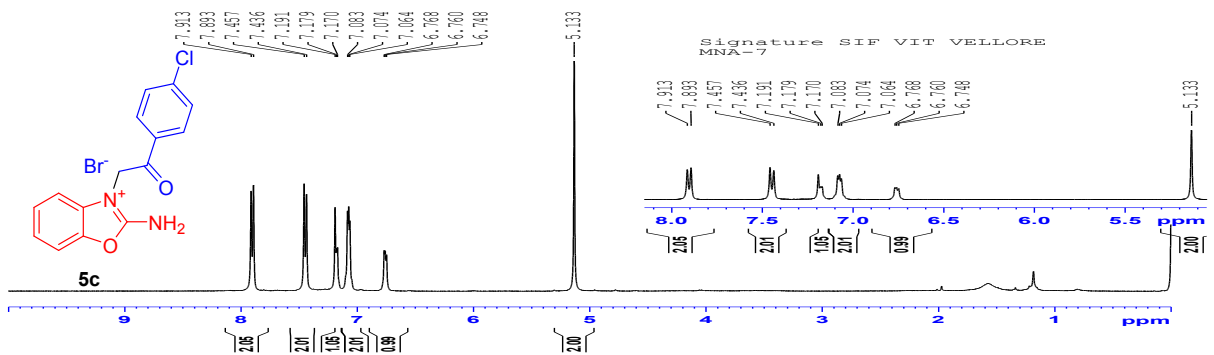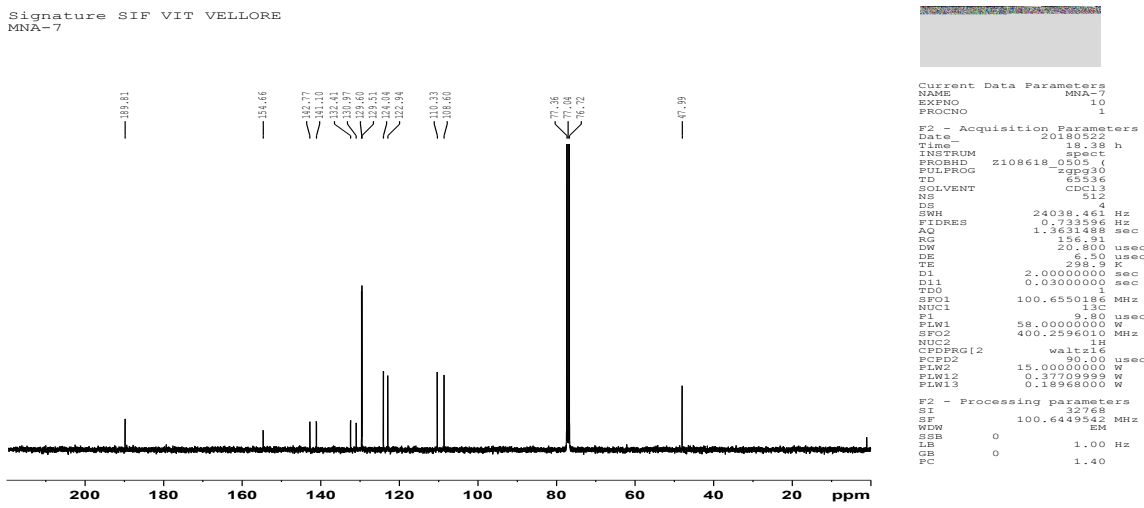

<sup>1</sup>H and <sup>13</sup>C NMR spectrum of compound 5c in CDCl<sub>3</sub>

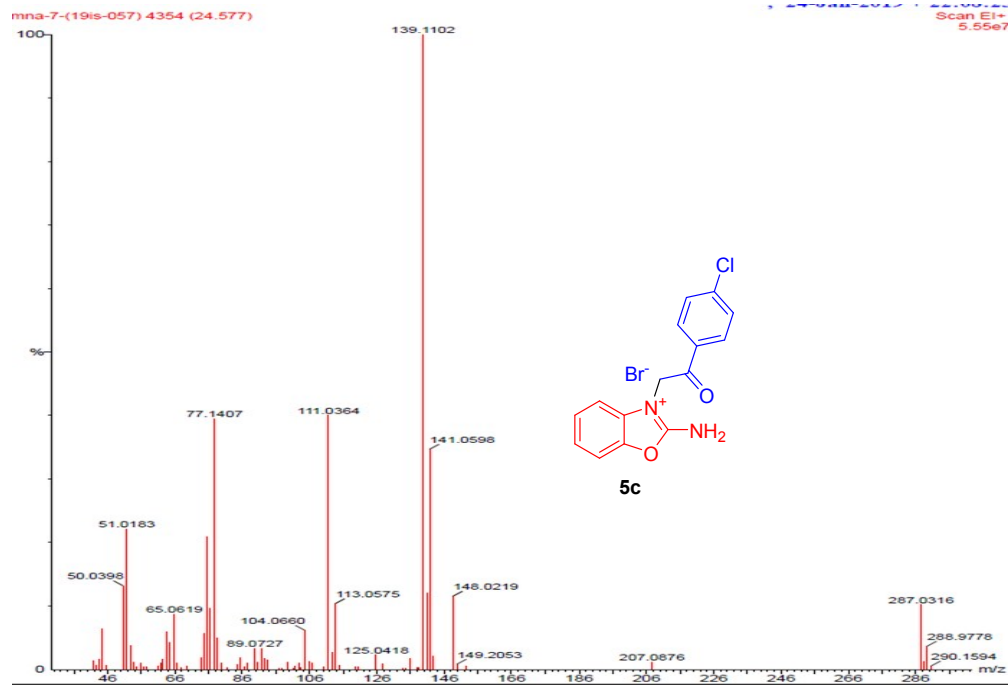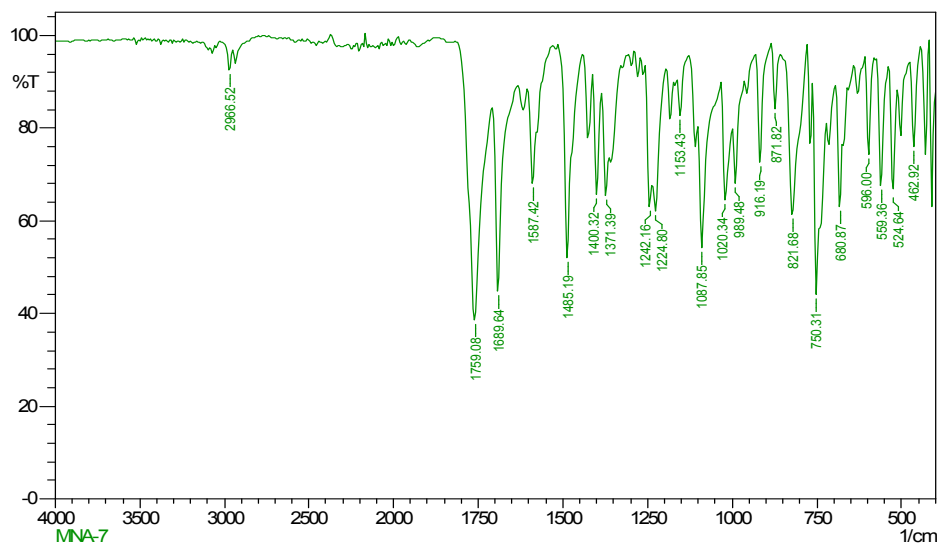

GC MS and IR spectra of compound 5c

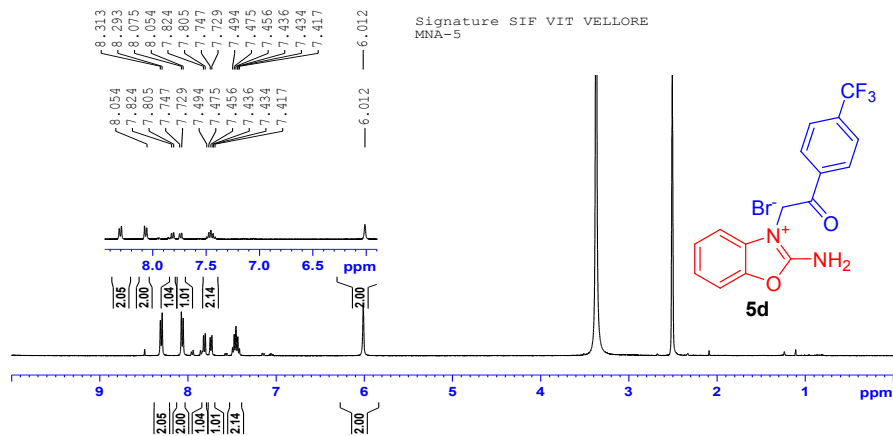

Signature SIF VIT VELLORE  
MNA-5

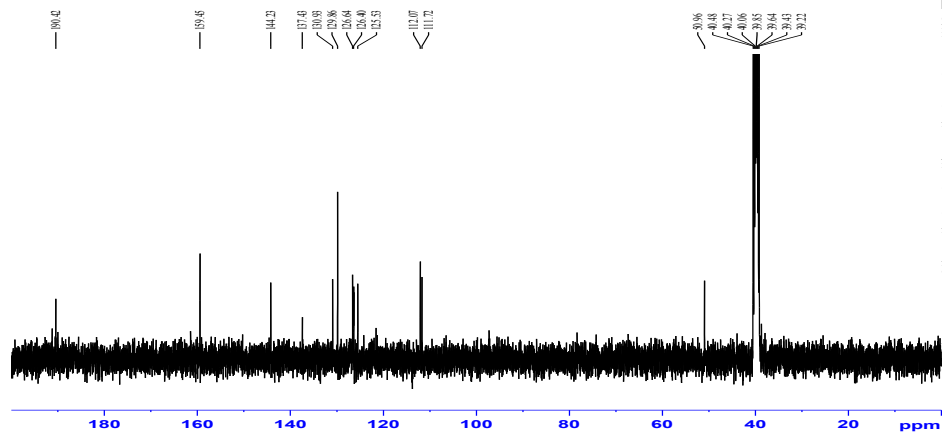

$^1\text{H}$  and  $^{13}\text{C}$  NMR spectrum of compound 5d in  $\text{CDCl}_3$



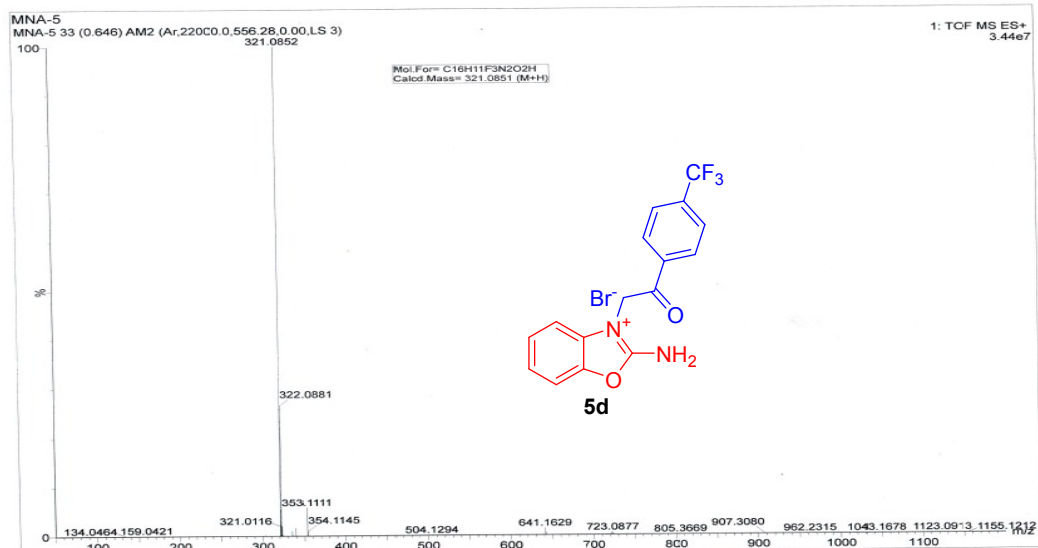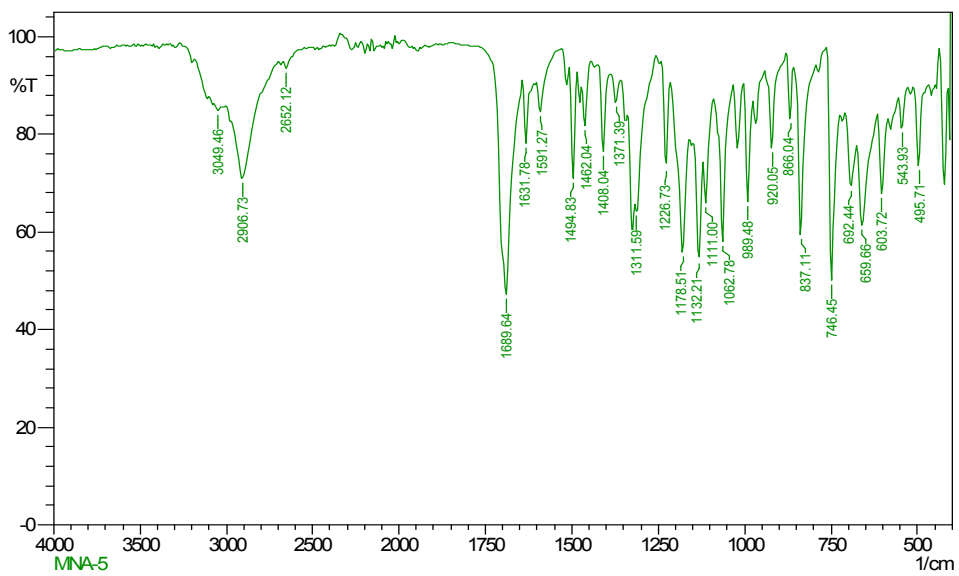

**GC MS and IR spectra of compound 5d**

Signature SIF VIT VELLORE  
MNA-6

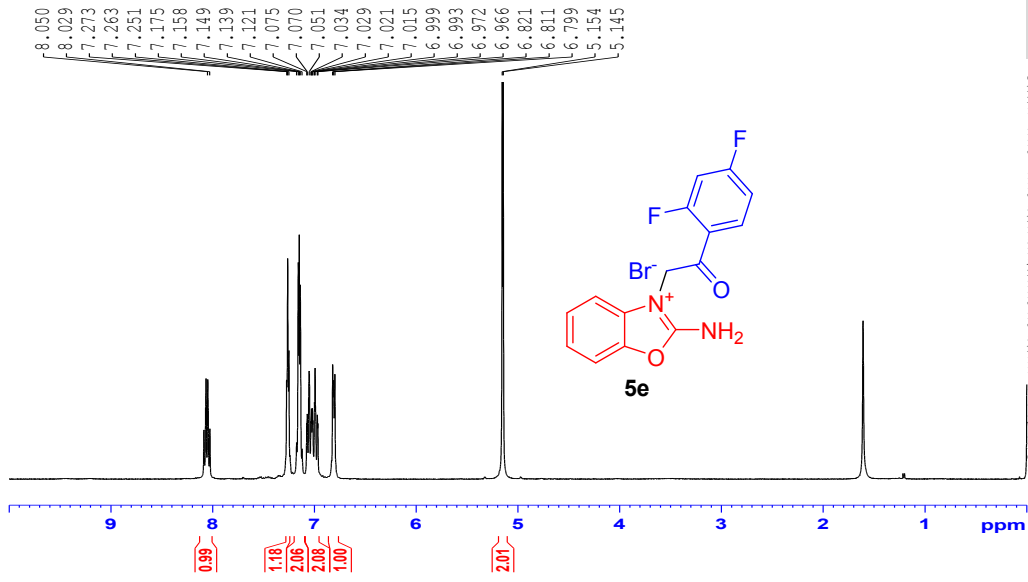

```

Current Data Parameters
NAME      MNA-6
EXPNO    11
PROCNO   1

F2 - Acquisition Parameters
Date_    20180522
Time     18.42 h
INSTRUM  spect
PROBHD   z108618_0505 (
PULPROG  zg30
TD        65536
SOLVENT  CDCl3
NS        16
DS        2
SWH       8012.820 Hz
FIDRES    0.244532 Hz
AQ        4.0894465 sec
RG         175.97
DW         62.400 usec
DE         6.50 usec
TE         298.4 K
TD0        1.0000000 sec
SFO1      400.2604716 MHz
NUC1      1H
P1         14.27 usec
PLW1      15.00000000 W

F2 - Processing parameters
SI         65536
SF         400.2580085 MHz
WDW        EM
SSB        0
LB         0.30 Hz
GB         0
PC         1.00
  
```

Signature SIF VIT VELLORE  
MNA-6

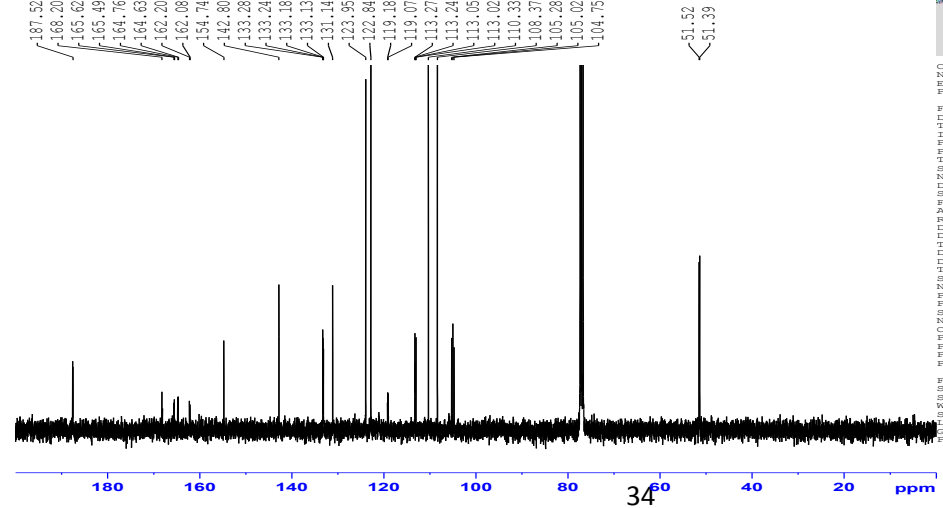

```

Current Data Parameters
NAME      MNA-6
EXPNO    12
PROCNO   1

F2 - Acquisition Parameters
Date_    20180522
Time     19.12 h
INSTRUM  spect
PROBHD   z108618_0505 (
PULPROG  zg30
TD        65536
SOLVENT  CDCl3
NS        12
DS        4
SWH       24038.461 Hz
FIDRES    0.732596 Hz
AQ        1.3631488 sec
RG         156.91
DW         20.800 usec
DE         6.50 usec
TE         299.1 K
TD0        2.0000000 sec
D11        0.03000000 sec
SFO1      100.6550186 MHz
NUC1      13C
P1         9.80 usec
PLW1      58.00000000 W
SFO2      400.2596010 MHz
NUC2      1H
CPDPRG[2] waltz16
PCPD2     90.00 usec
PLW2      15.00000000 W
PLW12     0.37709999 W
PLW13     0.18968000 W

F2 - Processing parameters
SI         32768
SF         100.6449542 MHz
WDW        EM
SSB        0
LB         1.00 Hz
GB         0
PC         1.40
  
```

# $^1\text{H}$ and $^{13}\text{C}$ NMR spectrum of compound 5e in $\text{CDCl}_3$

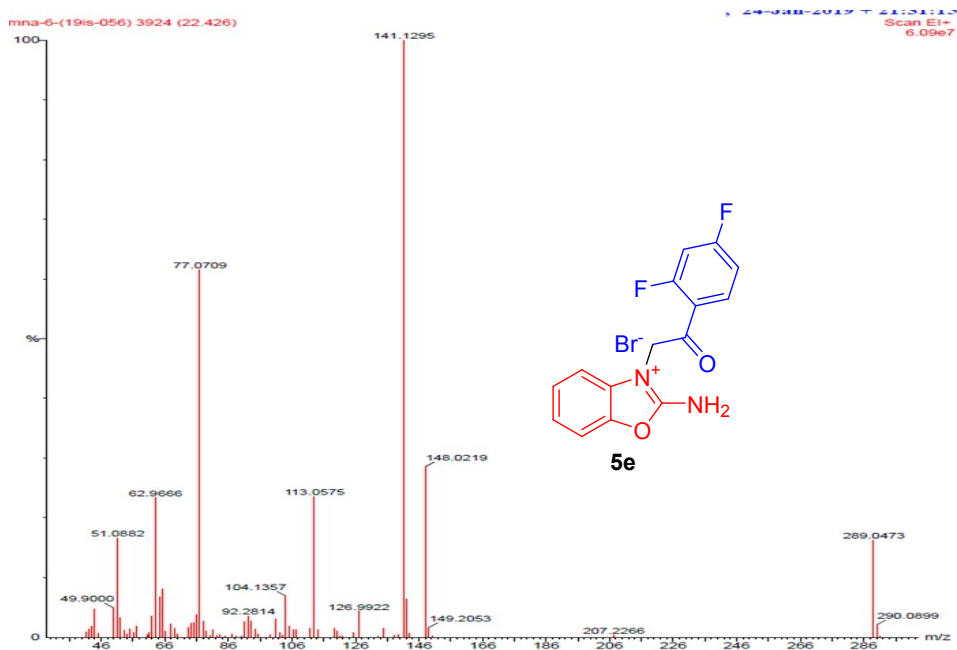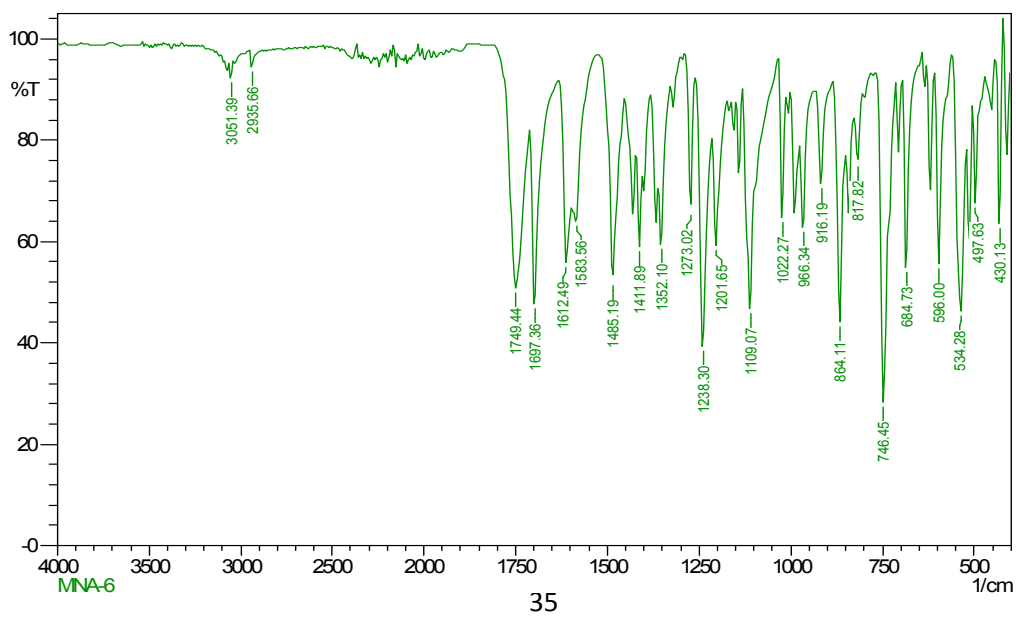

# GC MS and IR spectra of compound 5e

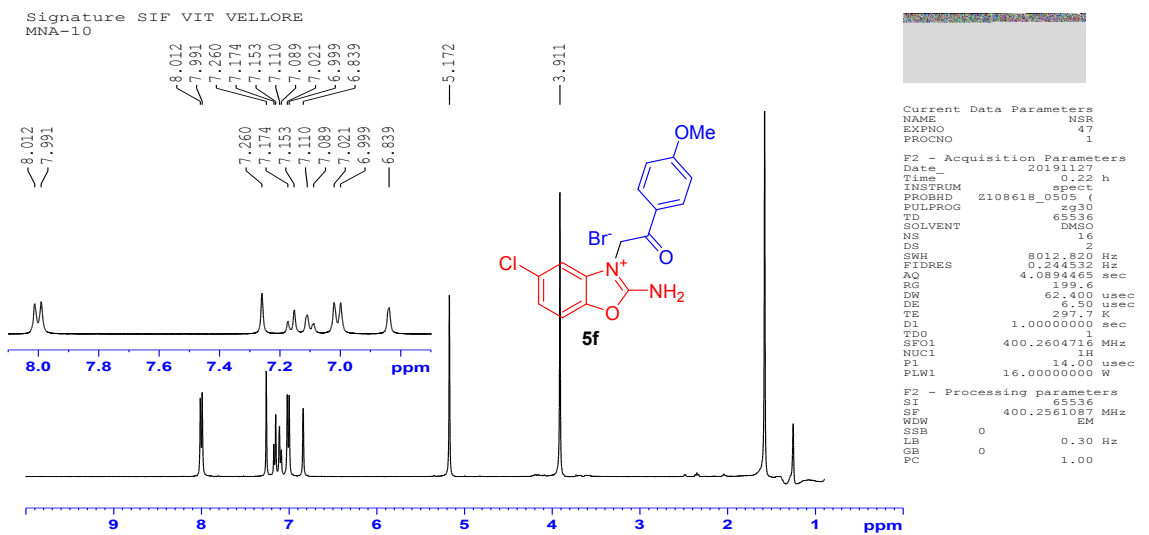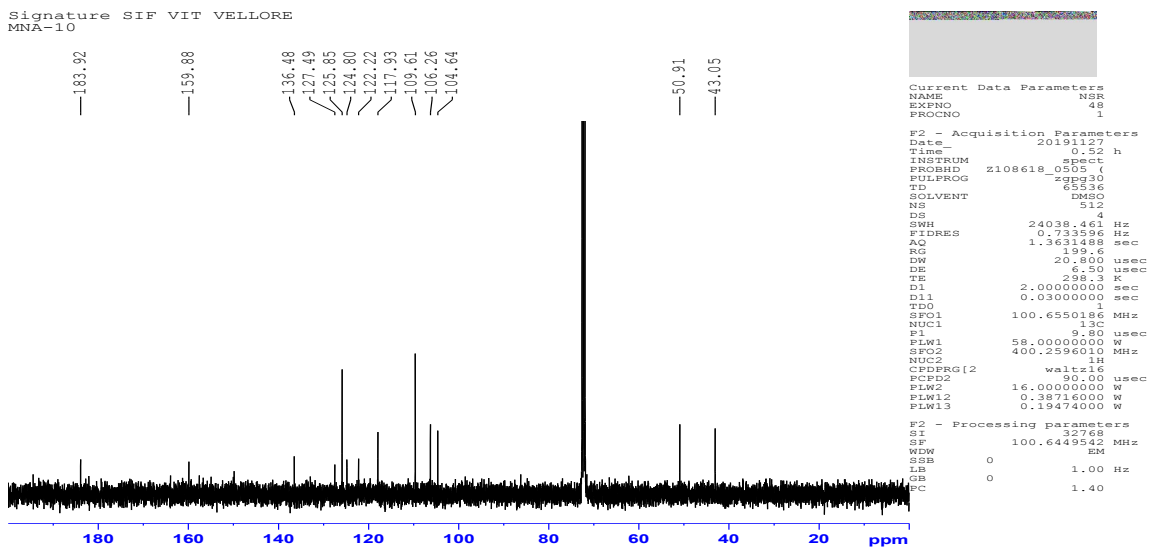

## $^1\text{H}$ and $^{13}\text{C}$ NMR spectrum of compound **5f** in $\text{CDCl}_3$

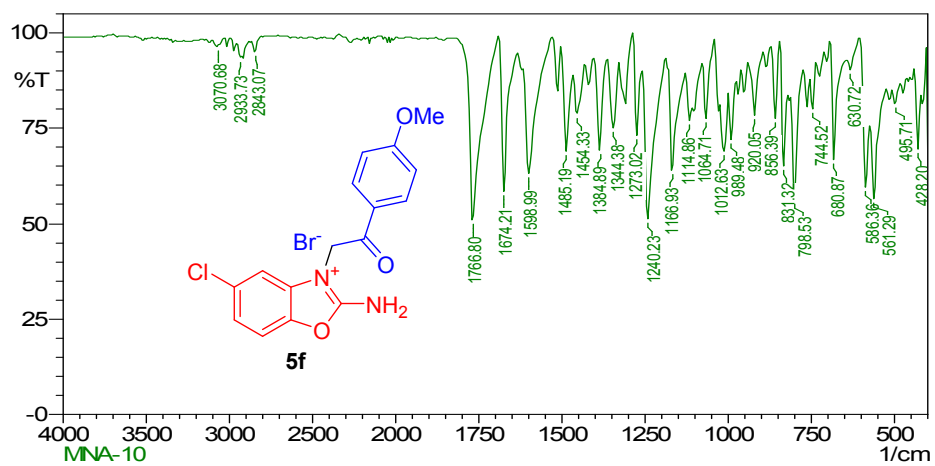

## IR spectra of compound **5f**

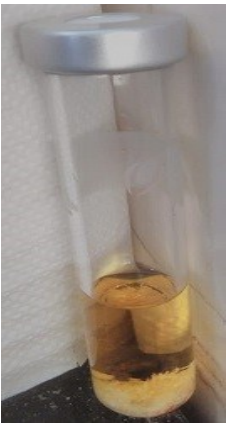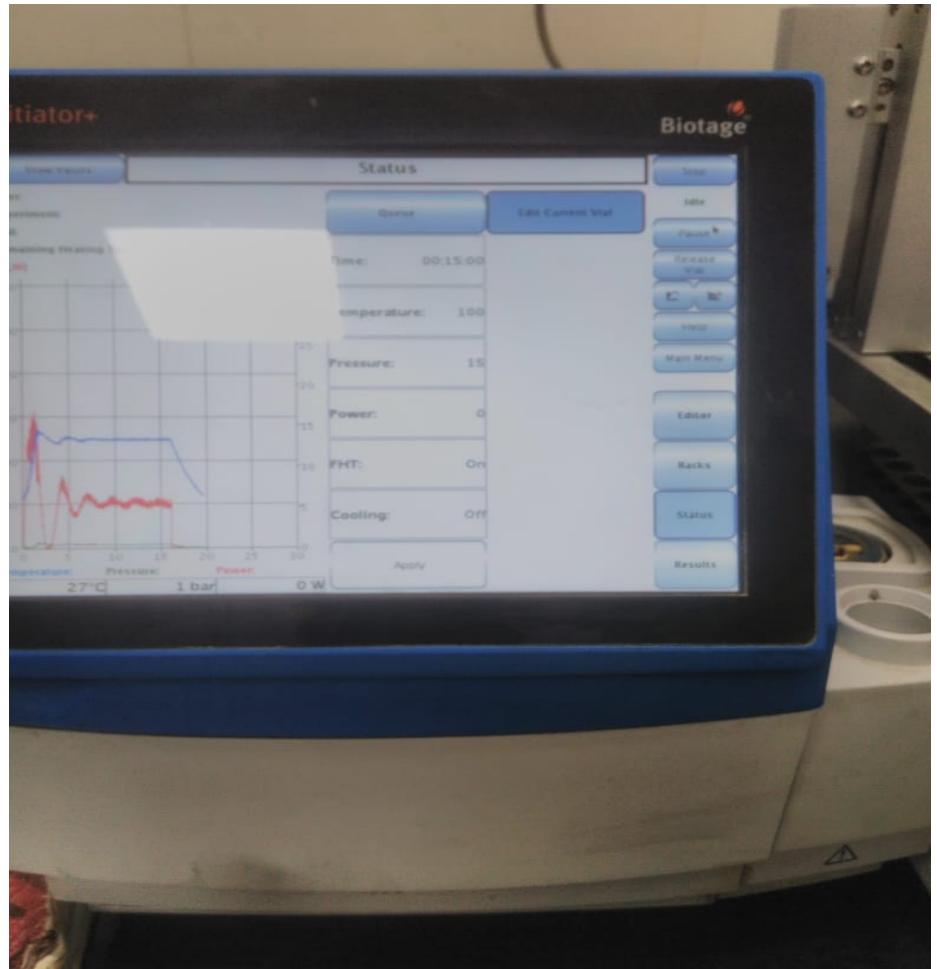

**Microwave reactions were carried in Biotage instrument, 2011 model, SW version: 4.1.3.  
Build 11768**
